# Supplementary material for: Carbazole–benzimidazole based dyes for acid responsive ratiometric emissive switches
Source: Royal Society of Chemistry journal article supplement (doi:10.1039/c6nj00063k), 2016-01-01
Supplement: c6nj00063k1.pdf [file c6nj00063k1.pdf]

## Supporting Information

### Carbazole-benzimidazole based dyes for acid responsive ratiometric emissive switches

Krishnendu Aich,<sup>a,c</sup> Sangita Das,<sup>a</sup> Shyamaprosad Goswami,<sup>\*a</sup> Ching Kheng Quah,<sup>b</sup> Deblina Sarkar,<sup>c</sup> Tapan Kumar Mondal<sup>c</sup> and Hoong-Kun Fun,<sup>b</sup>

<sup>a</sup> Department of Chemistry, Indian Institute of Engineering Science and Technology, Shibpur, Howrah, 711 103, India, Tel. +91-33-2668 4561-3 ext. 498; Fax. +91-33-2668 2916. E-mail [spgoswamical@yahoo.com](mailto:spgoswamical@yahoo.com)

<sup>b</sup>X-ray Crystallography Unit, School of Physics, Universiti Sains Malaysia, 11800 USM, Penang, Malaysia

<sup>c</sup> Department of Chemistry, Jadavpur University, Kolkata-700032, India.

**Table S1:** Absorbance, Emission peaks and fluorescence quantum yields in different solvents for **CBIM1**.

| Solvents                                                                                                                         | n-hexane | toluene | THF  | DCM  | CH <sub>3</sub> CN | DMSO | MeOH/H <sub>2</sub> O (1/1) |
|----------------------------------------------------------------------------------------------------------------------------------|----------|---------|------|------|--------------------|------|-----------------------------|
| Absorbance Peak (nm)                                                                                                             | 317      | 319     | 320  | 323  | 320                | 324  | 322                         |
| Emission Peak (nm) <sup>a</sup>                                                                                                  | 382      | 385     | 385  | 387  | 385                | 388  | 384                         |
| Fluorescence Quantum Yield (Φ) <sup>b</sup>                                                                                      | 0.18     | 0.23    | 0.29 | 0.14 | 0.23               | 0.30 | 0.25                        |
| <sup>a</sup> excitation wavelength (nm) is 340 nm; <sup>b</sup> Φ was obtained by compared with anthracene (Φ = 0.27 in ethanol) |          |         |      |      |                    |      |                             |

| Solvents                                                                                                                                    | n-hexane | toluene | THF    | DCM    | CH <sub>3</sub> CN | DMSO   | MeOH/H <sub>2</sub> O (1/1) |
|---------------------------------------------------------------------------------------------------------------------------------------------|----------|---------|--------|--------|--------------------|--------|-----------------------------|
| Absorbance Peak (nm)                                                                                                                        | 353 nm   | 356 nm  | 350 nm | 352 nm | 343 nm             | 358 nm | 353 nm                      |
| Emission Peak (nm) <sup>a</sup>                                                                                                             | 429 nm   | 445 nm  | 448 nm | 456 nm | 465 nm             | 473 nm | 481 nm                      |
| Fluorescence Quantum Yield (Φ) <sup>b</sup>                                                                                                 | 0.49     | 0.50    | 0.44   | 0.57   | 0.47               | 0.58   | 0.62                        |
| <sup>a</sup> excitation wavelength (nm) is 370 nm; <sup>b</sup> Φ was obtained by compared with fluorescein (Φ = 0.97 in 1 N NaOH solution) |          |         |        |        |                    |        |                             |

**Table S2:** Absorbance, Emission peaks and fluorescence quantum yields in different solvents for **CBIM2**.

**Table S3:** Absorbance, Emission peaks and fluorescence quantum yields in different solvents for **CBIM3**.

| Solvents                                           | n-hexane | toluene | THF  | DCM  | CH <sub>3</sub> CN | DMSO | MeOH/H <sub>2</sub> O (1/1) |
|----------------------------------------------------|----------|---------|------|------|--------------------|------|-----------------------------|
| Absorbance Peak (nm)                               | 317      | 319     | 320  | 323  | 320                | 324  | 323                         |
| Emission Peak (nm) <sup>a</sup>                    | 382      | 385     | 385  | 387  | 385                | 388  | 384                         |
| Fluorescence Quantum Yield ( $\Phi$ ) <sup>b</sup> | 0.18     | 0.23    | 0.29 | 0.14 | 0.23               | 0.30 | 0.25                        |

<sup>a</sup> excitation wavelength (nm) is 340 nm; <sup>b</sup>  $\Phi$  was obtained by compared with anthracene ( $\Phi = 0.27$  in ethanol)

### Computational Study:

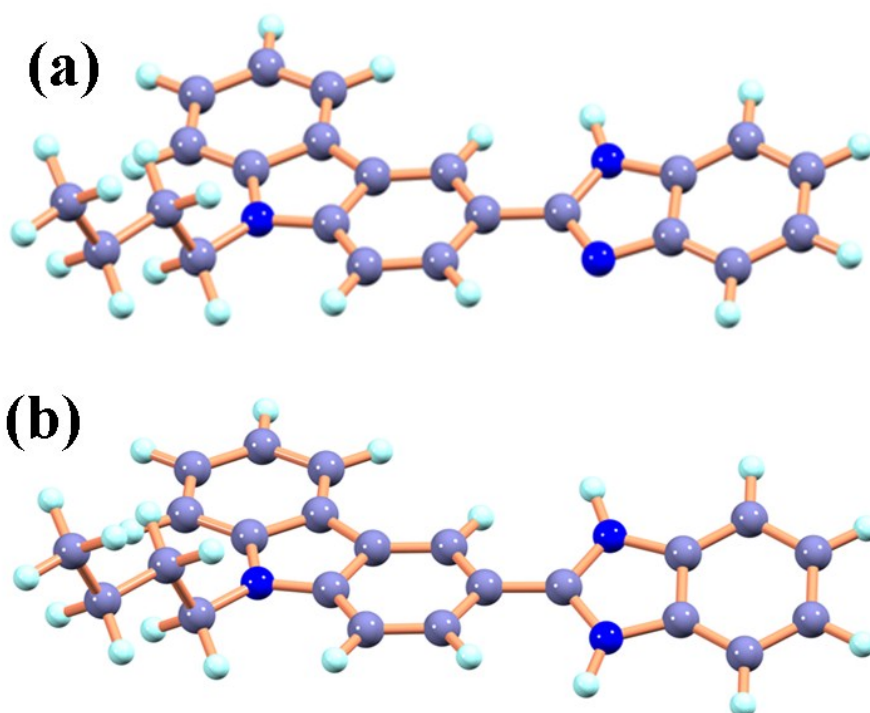

**Figure S1:** Optimized structure of (a) CBIM1 and (b) CBIM1-H<sup>+</sup> calculated by DFT/B3LYP/6-31+G(d) method.

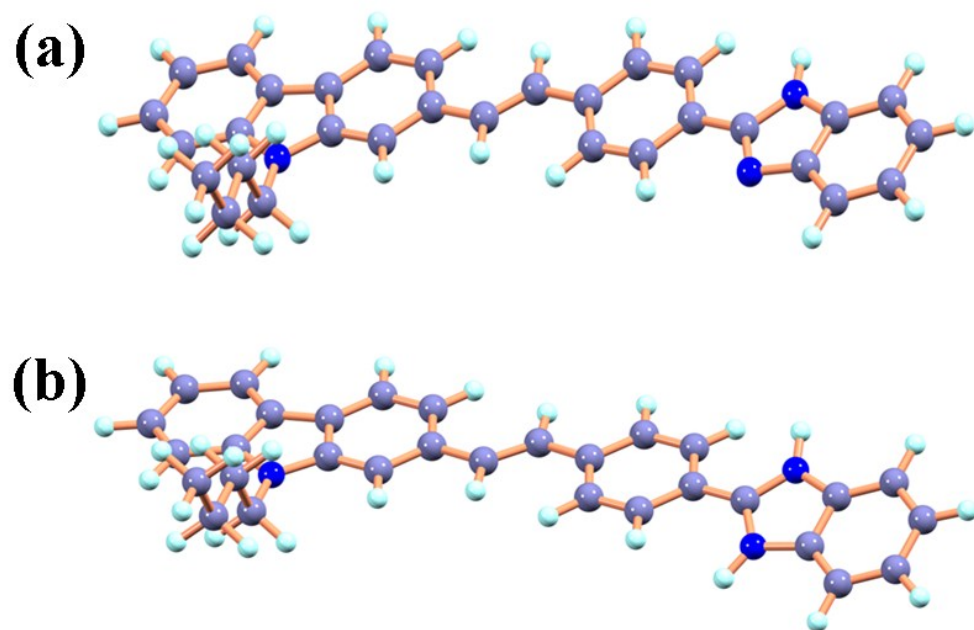

**Figure S2:** Optimized structure of (a) CBIM2 and (b) CBIM2-H<sup>+</sup> calculated by DFT/B3LYP/6-31+G(d) method .

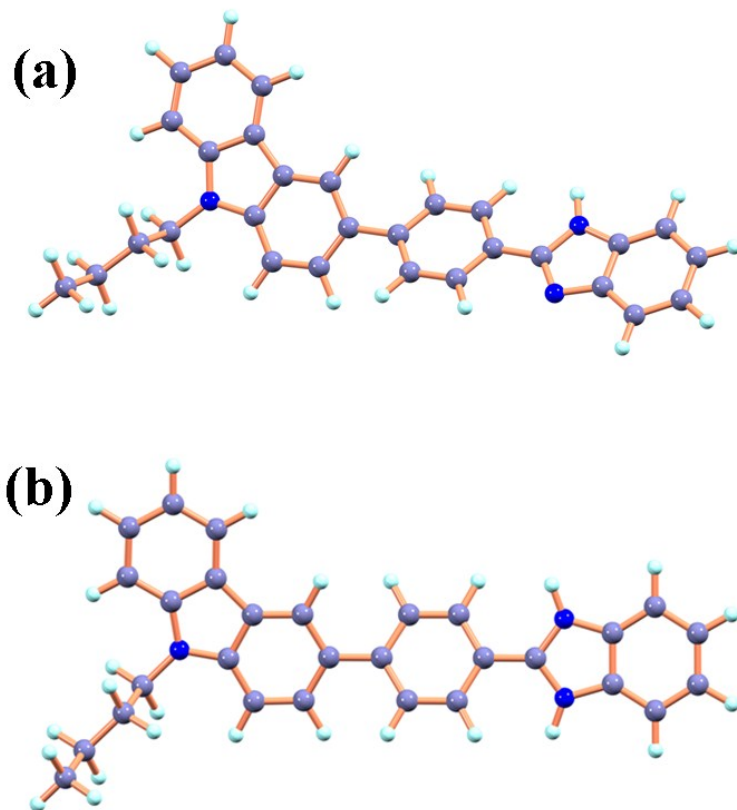

**Figure S3:** Optimized structure of (a) CBIM3 and (b) CBIM3-H<sup>+</sup> calculated by DFT/B3LYP/6-31+G(d) method.

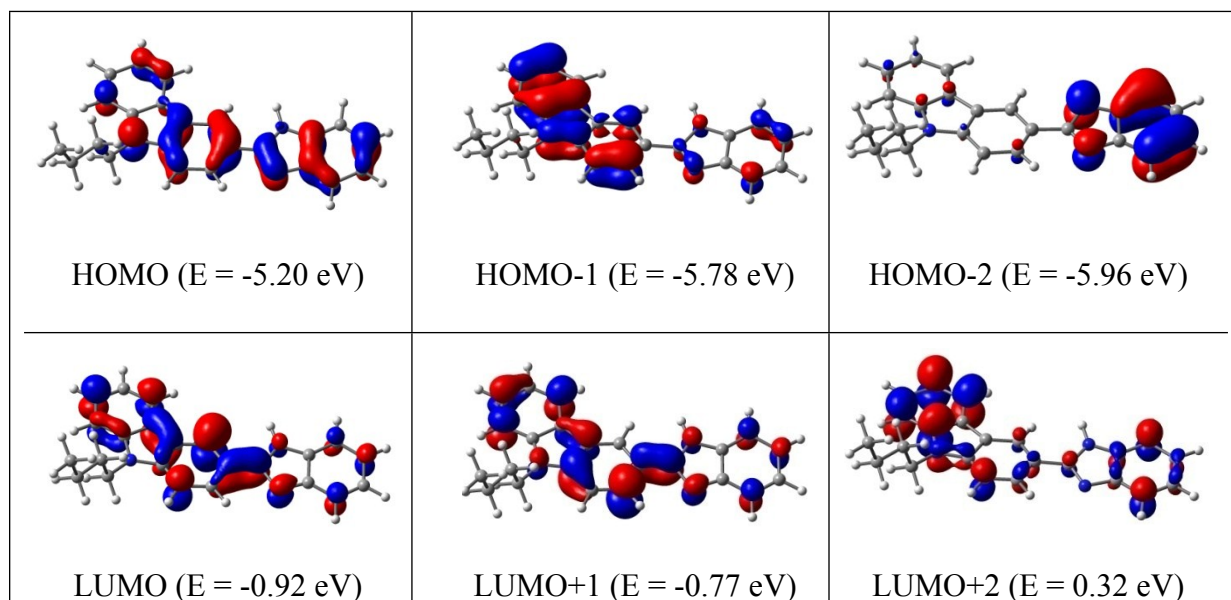

**Figure S4:** Contour plots of some selected molecular orbitals of CBIM1

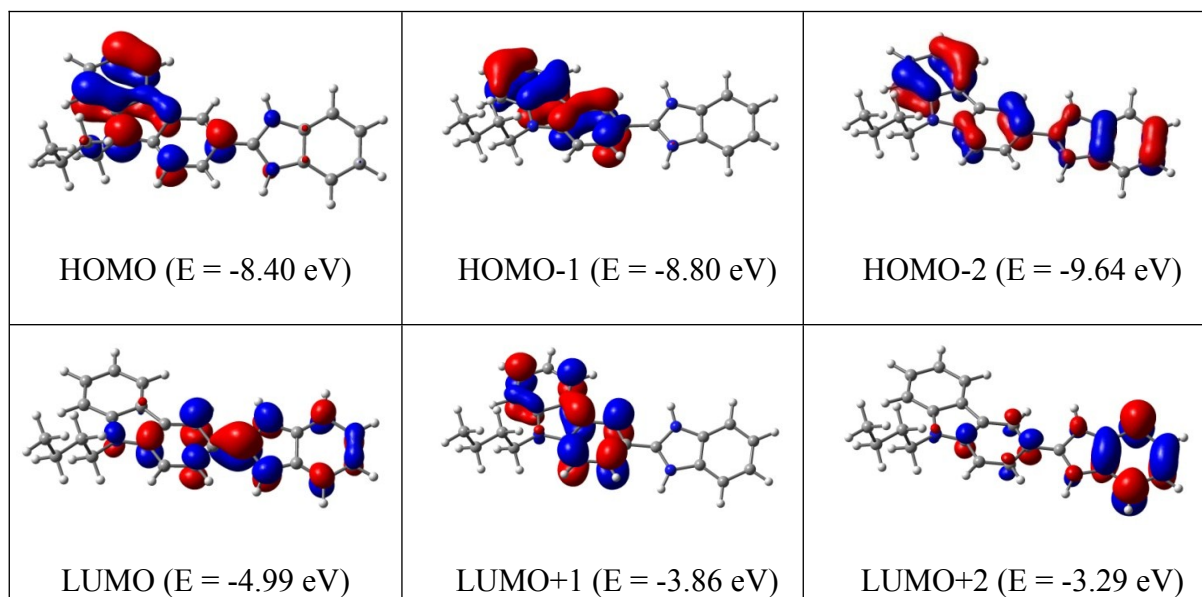

**Figure S5:** Contour plots of some selected molecular orbitals of CBIM1-H<sup>+</sup>

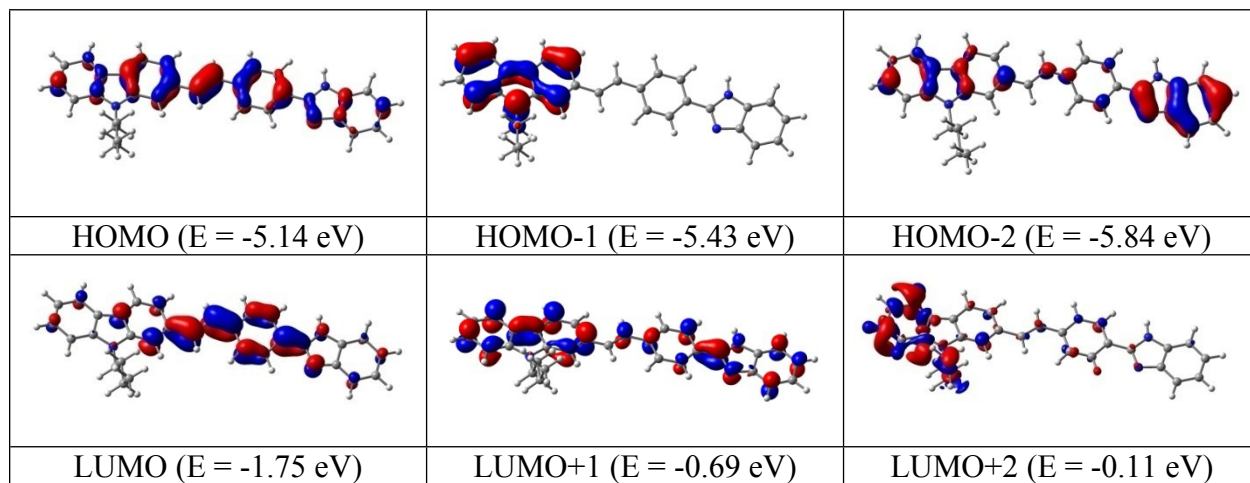

**Figure S6:** Contour plots of some selected molecular orbitals of CBIM2

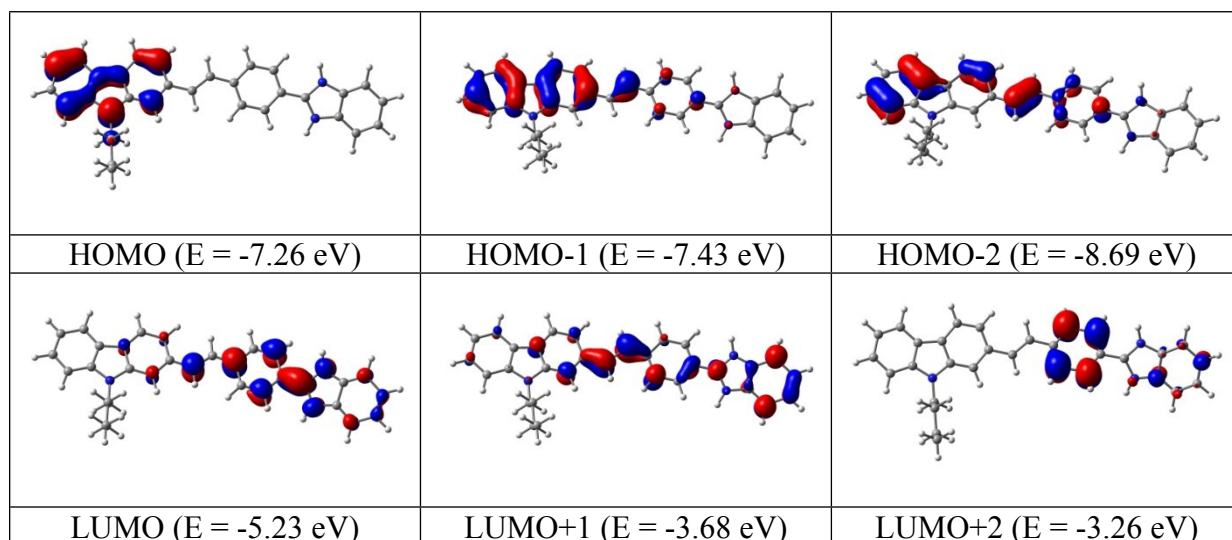

**Figure S7:** Contour plots of some selected molecular orbitals of CBIM2-H<sup>+</sup>

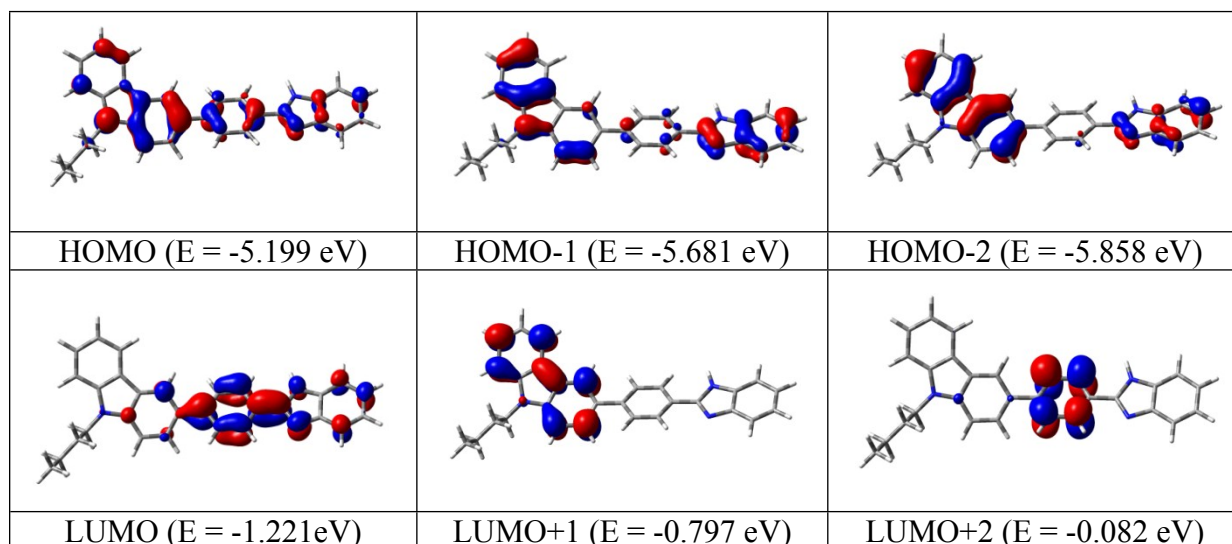

**Figure S8:** Contour plots of some selected molecular orbitals of CBIM3

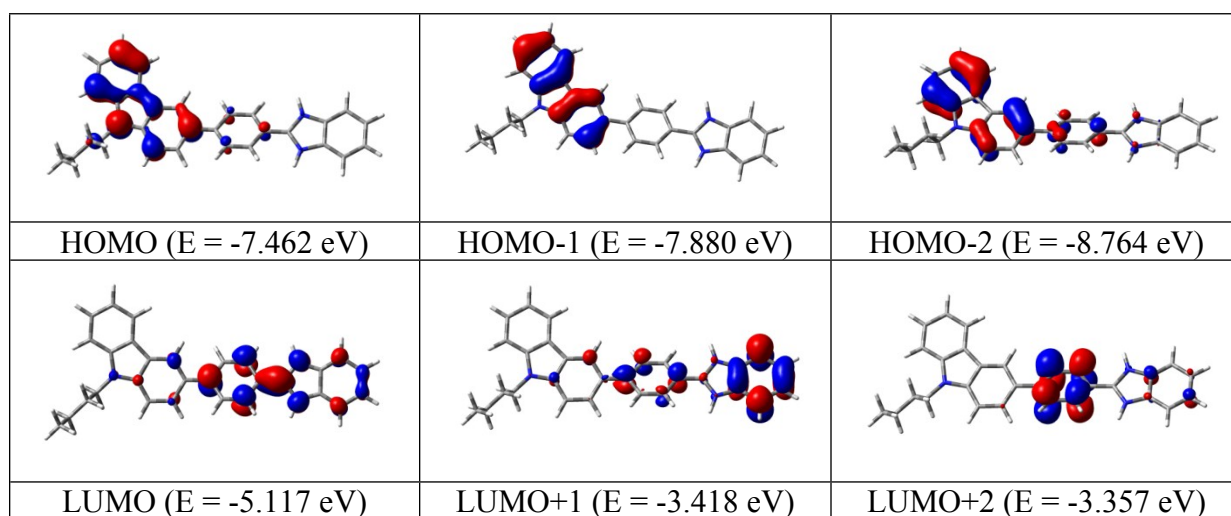

**Figure S9:** Contour plots of some selected molecular orbitals of CBIM3-H<sup>+</sup>

**Table S4:** Vertical electronic excitations of CBIM1, CBIM2 and CBIM3 calculated by TDDFT/CPCM method

| Compound             | Excitation    | Excitation wavelength (nm) | Oscillator strength (au) |
|----------------------|---------------|----------------------------|--------------------------|
| CBIM1                | HOMO→LUMO     | 330                        | 0.3789                   |
|                      | HOMO→LUMO+1   | 321                        | 0.5165                   |
|                      | HOMO-1→LUMO   | 290                        | 0.6328                   |
|                      | HOMO-1→LUMO+1 | 273                        | 0.1128                   |
| CBIM1-H <sup>+</sup> | HOMO→LUMO     | 372                        | 0.6822                   |
|                      | HOMO-1→LUMO   | 339                        | 0.1043                   |
|                      | HOMO→LUMO+1   | 307                        | 0.3789                   |
|                      | HOMO-2→LUMO   | 281                        | 0.4678                   |
| CBIM2                | HOMO→LUMO     | 407                        | 0.1247                   |
|                      | HOMO-1→LUMO   | 389                        | 0.9215                   |
|                      | HOMO-2→LUMO   | 327                        | 0.2520                   |
| CBIM2-H <sup>+</sup> | HOMO-1→LUMO   | 451                        | 0.2835                   |
|                      | HOMO→LUMO     | 448                        | 0.9928                   |
|                      | HOMO-2→LUMO   | 341                        | 0.6066                   |

|                      |               |     |        |
|----------------------|---------------|-----|--------|
| CBIM3                | HOMO→LUMO     | 358 | 0.9555 |
|                      | HOMO→LUMO+1   | 310 | 0.5251 |
|                      | HOMO-2→LUMO   | 294 | 0.1401 |
|                      | HOMO→LUMO+3   | 254 | 0.4095 |
| CBIM3-H <sup>+</sup> | HOMO→LUMO     | 454 | 0.8711 |
|                      | HOMO-1→LUMO   | 389 | 0.1133 |
|                      | HOMO→LUMO+1   | 317 | 0.1703 |
|                      | HOMO-3→LUMO   | 283 | 0.1169 |
|                      | HOMO-1→LUMO+1 | 270 | 0.2781 |

**Table S5:** Fluorescence life time data of CBIM2

| Entry                | $\Phi$ | $\tau$ (ns) | $k_r$ ( $10^8 \times s^{-1}$ ) | $k_{nr}$ ( $10^8 \times s^{-1}$ ) |
|----------------------|--------|-------------|--------------------------------|-----------------------------------|
| CBIM2                | 0.59   | 0.776       | 7.60                           | 5.28                              |
| CBIM2-H <sup>+</sup> | 0.78   | 2.036       | 3.83                           | 1.08                              |



# $^1\text{H}$ NMR, $^{13}\text{C}$ NMR and HRMS spectra

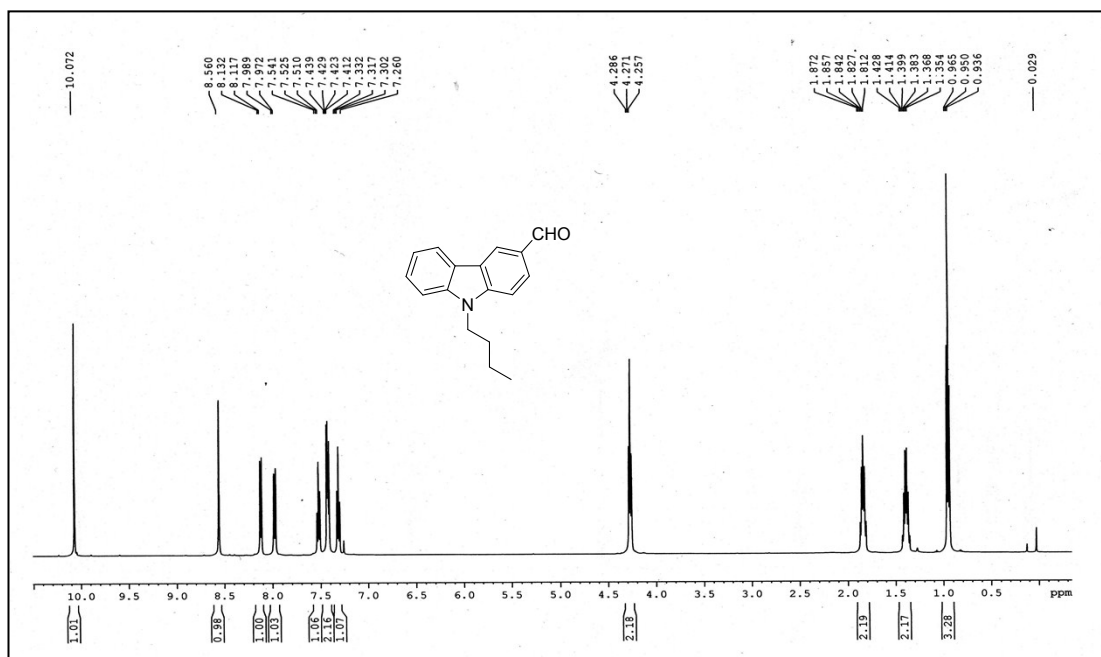

**Figure S10:**  $^1\text{H}$  NMR (400 MHz) spectrum of compound 2 in  $\text{CDCl}_3$

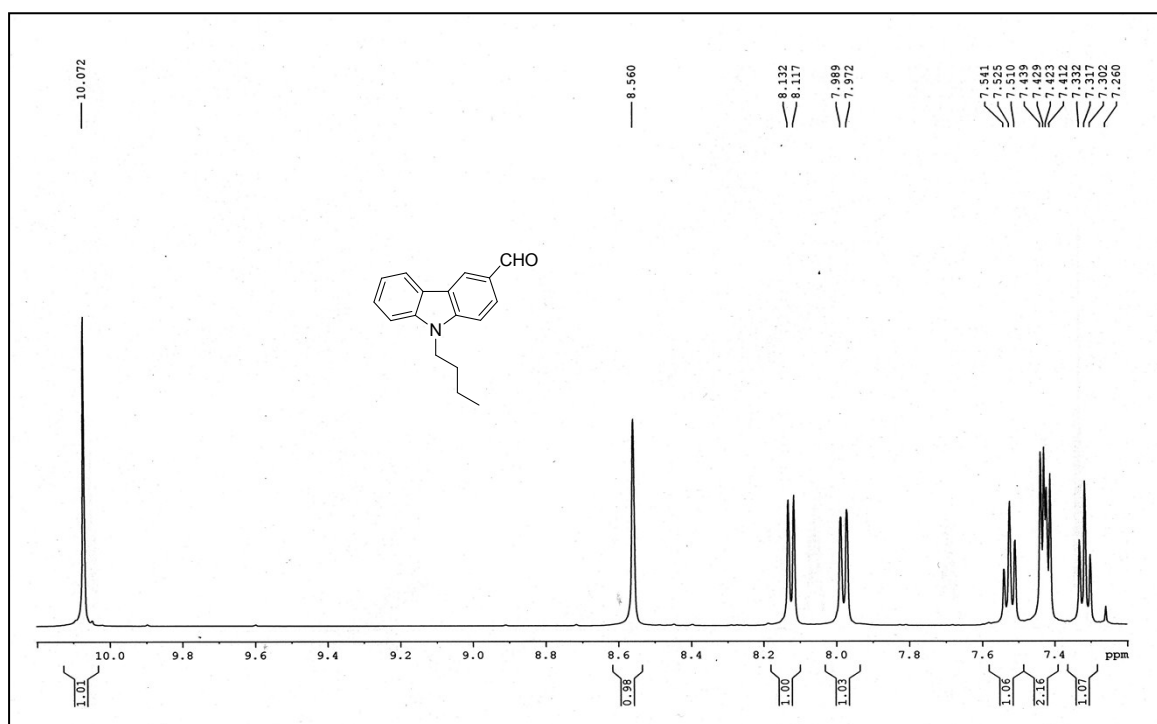

**Figure S10a:** Expansion mode of  $^1\text{H}$  NMR (400 MHz) spectrum of compound 2 in  $\text{CDCl}_3$

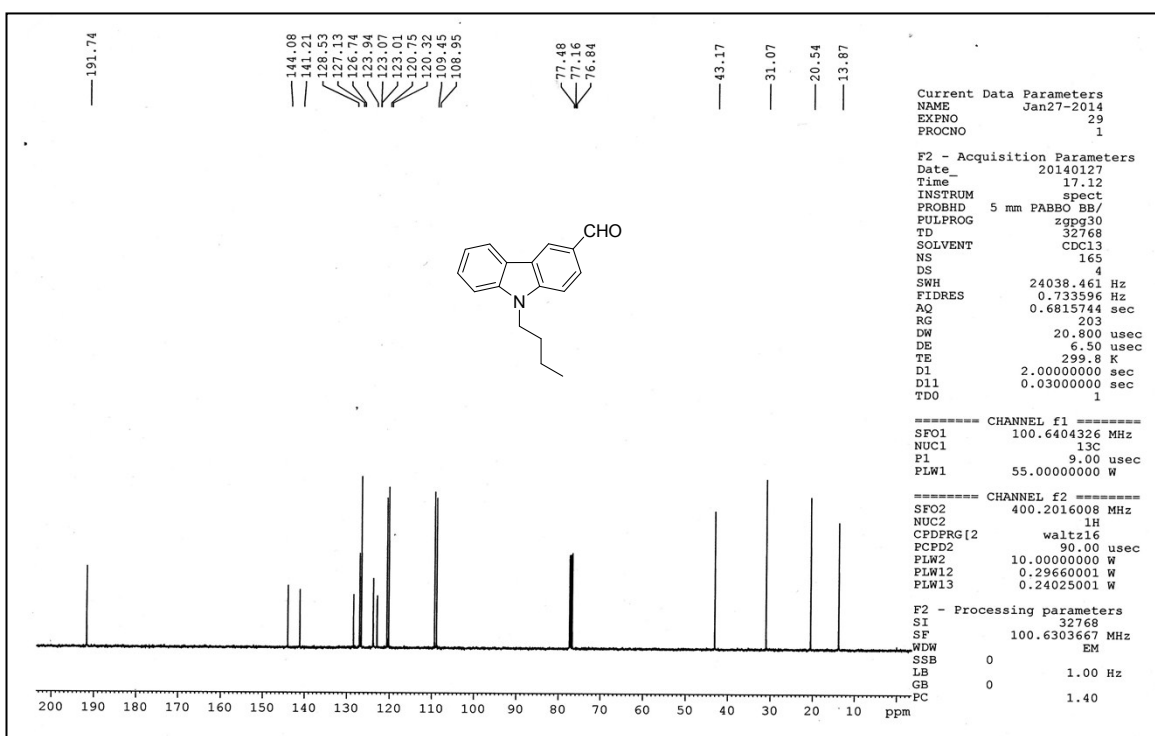

Figure S11:  $^{13}\text{C}$  NMR (100 MHz) spectrum of compound 2 in  $\text{CDCl}_3$

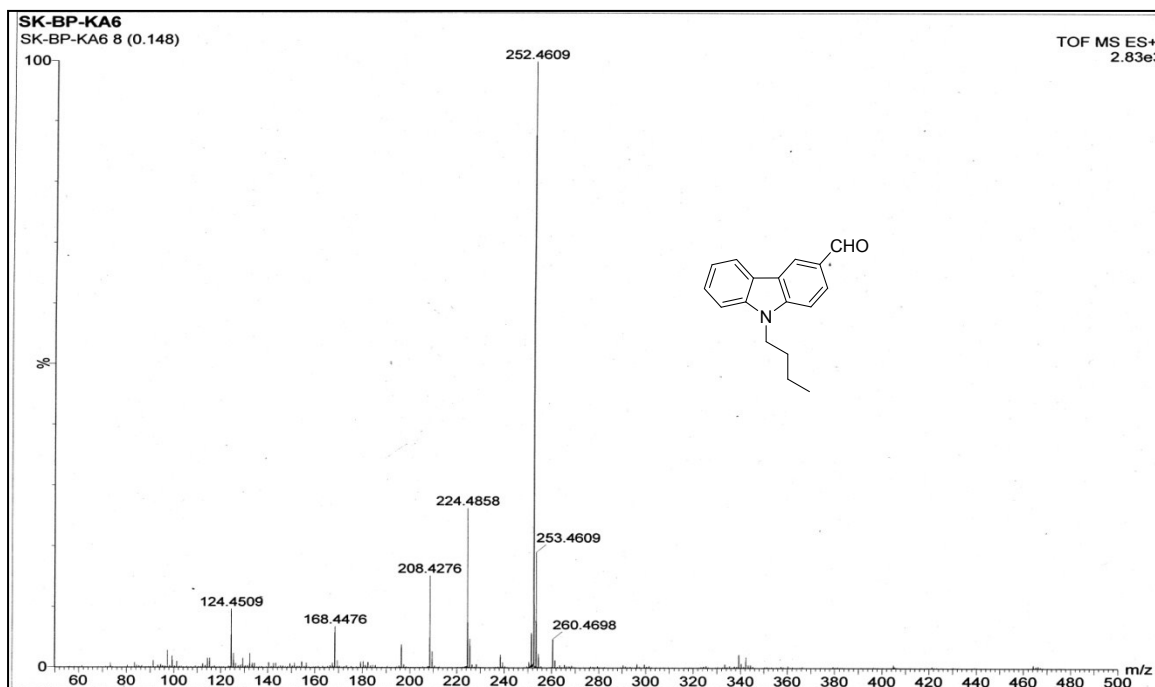

Figure S12: ESI MS spectrum of compound 2

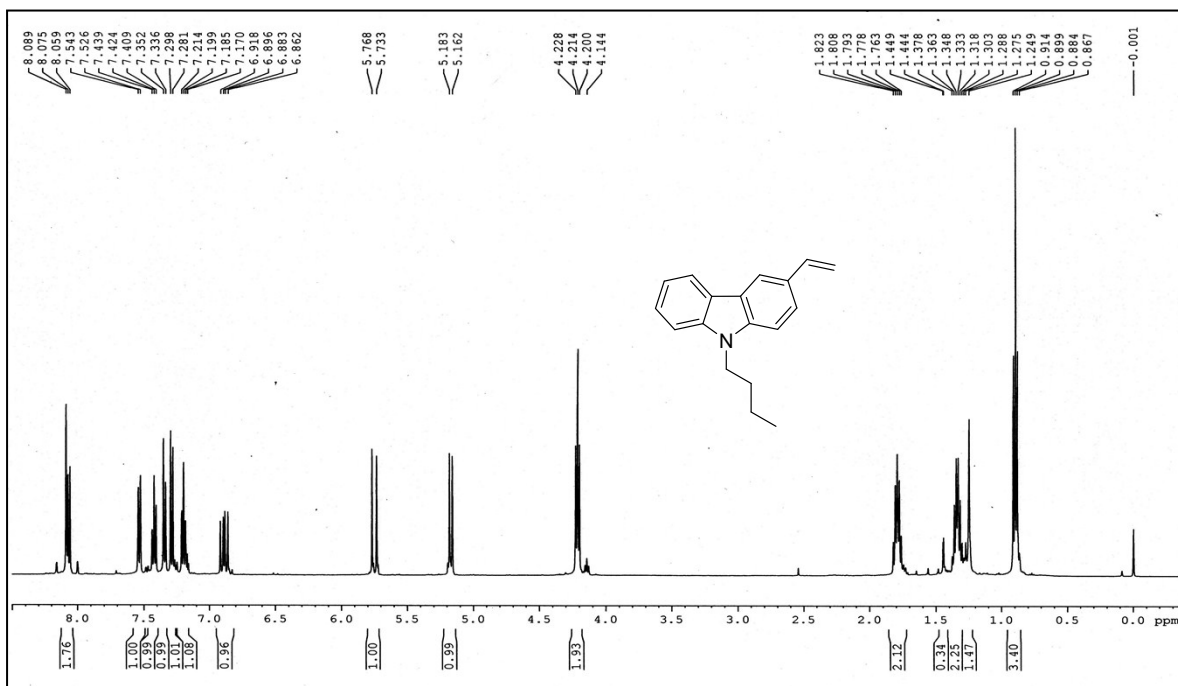

**Figure S13:**  $^1\text{H}$  NMR (400 MHz) spectrum of 9-butyl-3-vinyl-9H-carbazole (3) in  $\text{CDCl}_3$

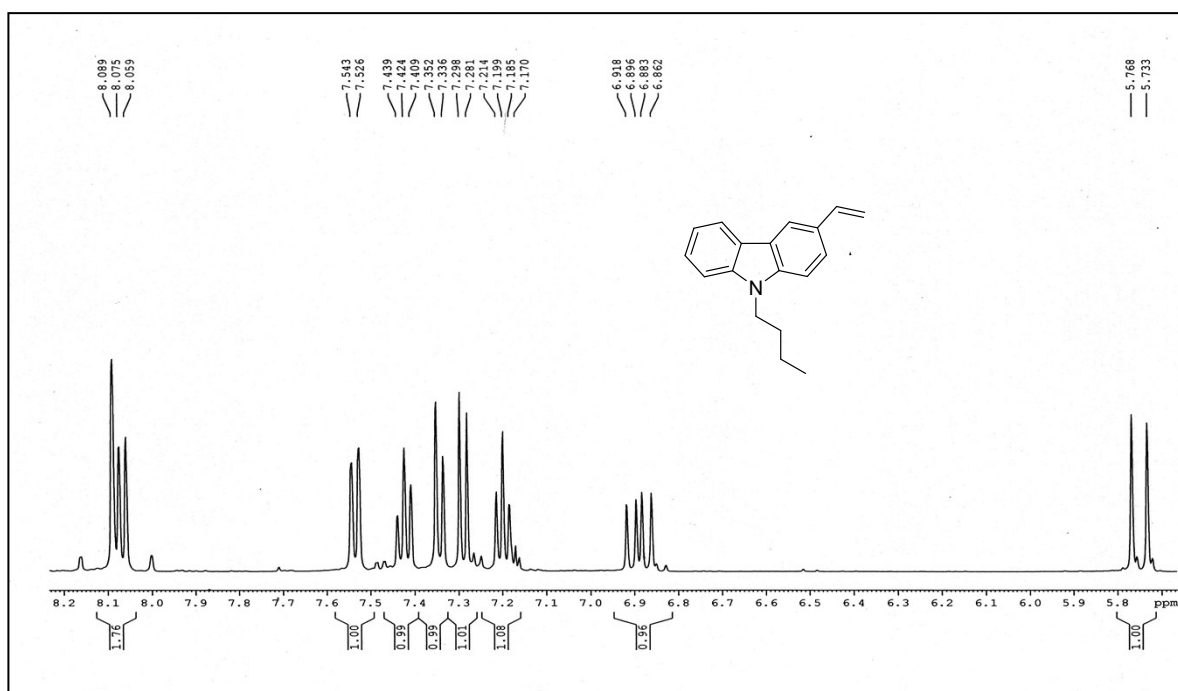

**Figure S13a:** Expansion mode of  $^1\text{H}$  NMR (400 MHz) spectrum of 9-butyl-3-vinyl-9H-carbazole (3) in  $\text{CDCl}_3$

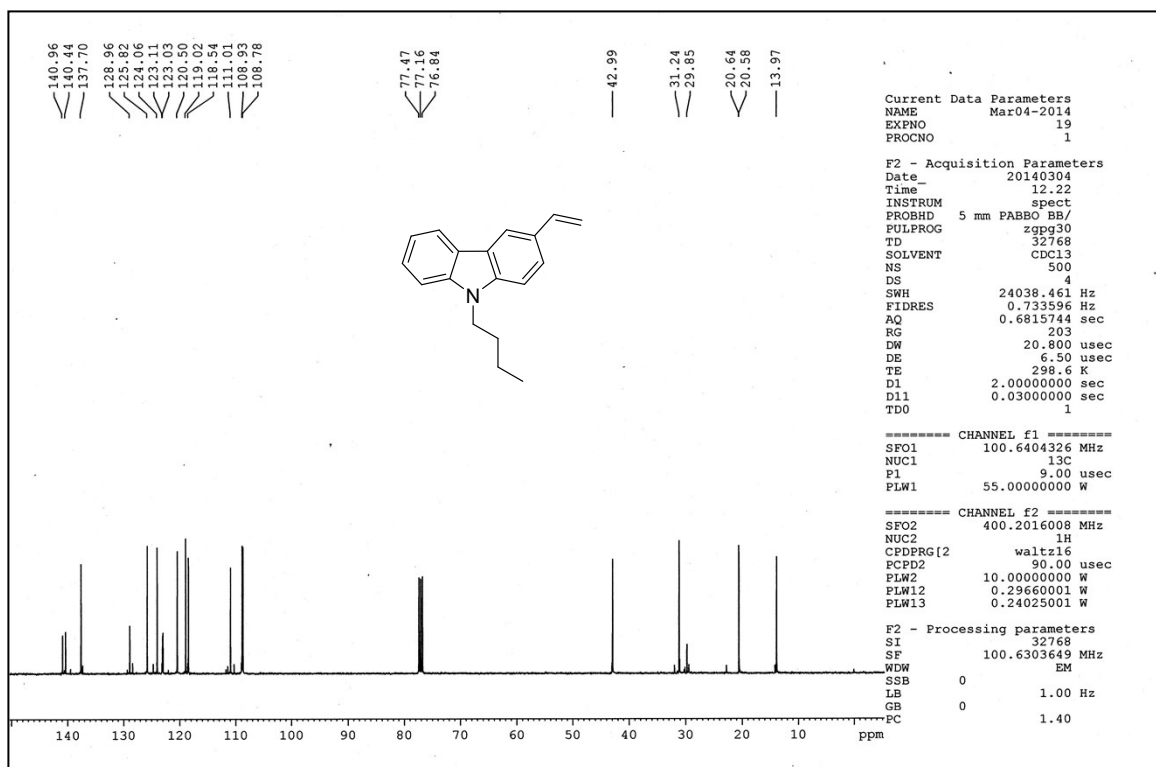

Figure S14:  $^{13}\text{C}$  NMR (100 MHz) spectrum of 9-butyl-3-vinyl-9H-carbazole (3) in  $\text{CDCl}_3$

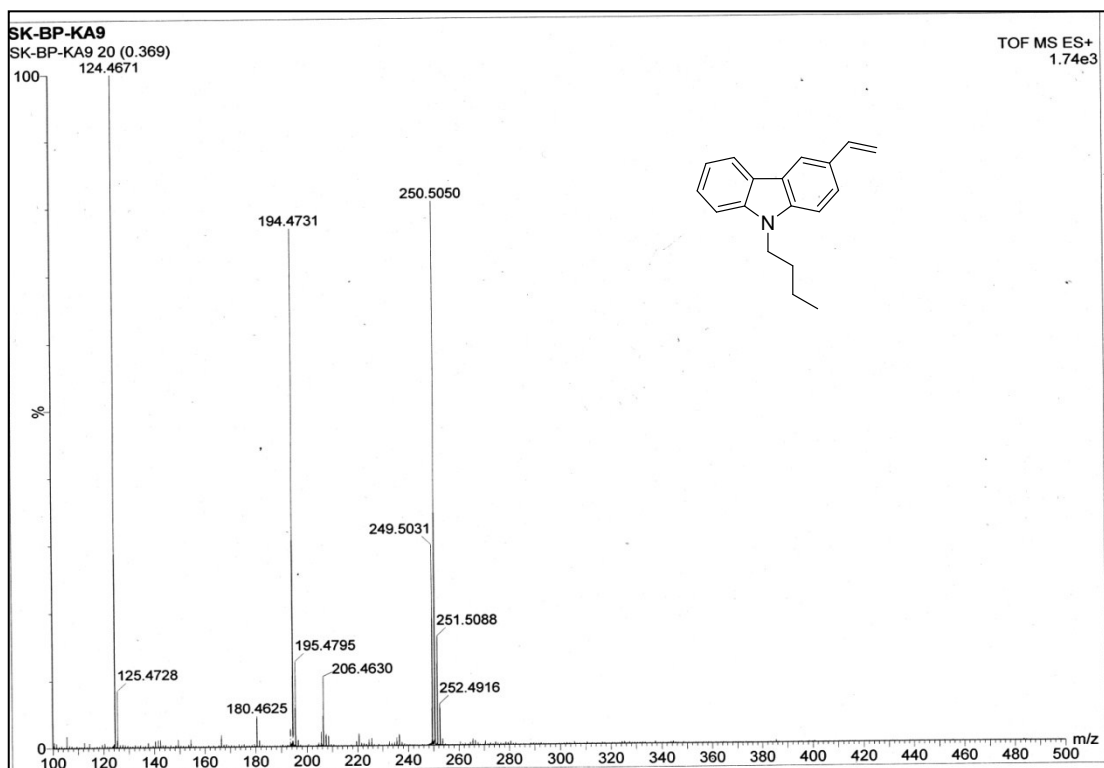

Figure S15: ESI MS spectrum of 9-butyl-3-vinyl-9H-carbazole (3)

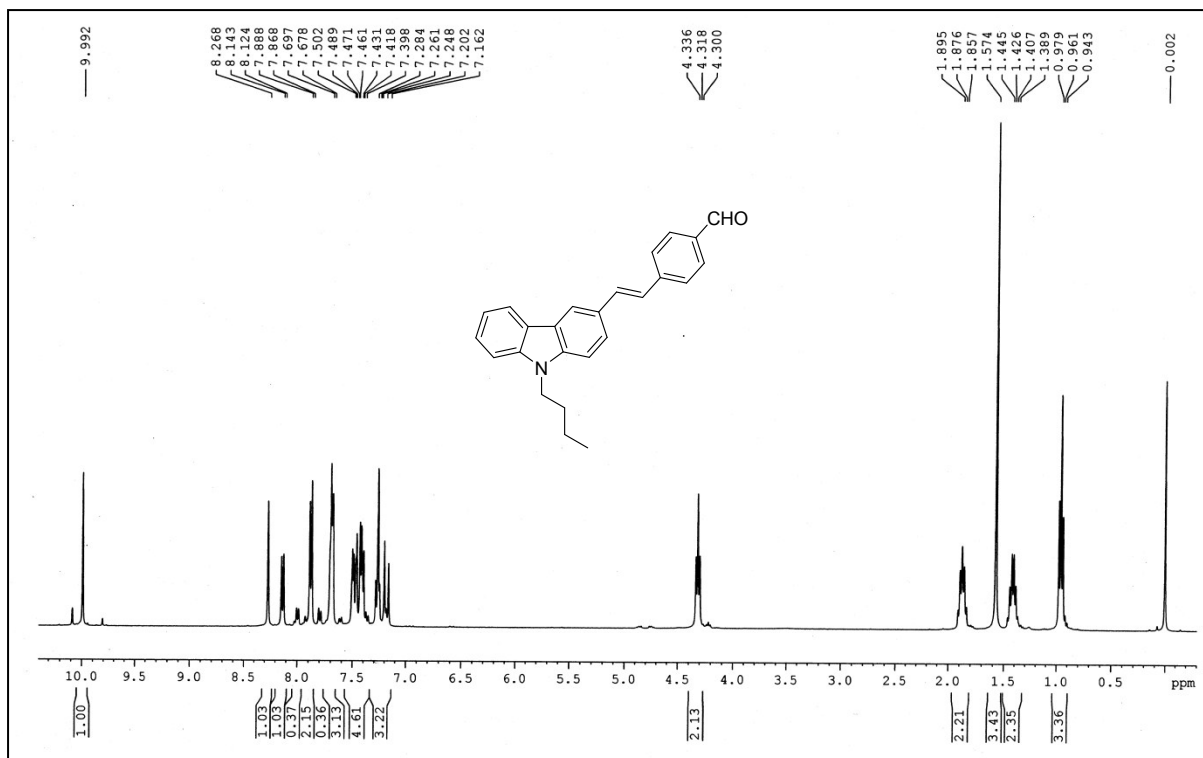

Figure S16: <sup>1</sup>H NMR (400 MHz) spectrum of compound 4 in CDCl<sub>3</sub>

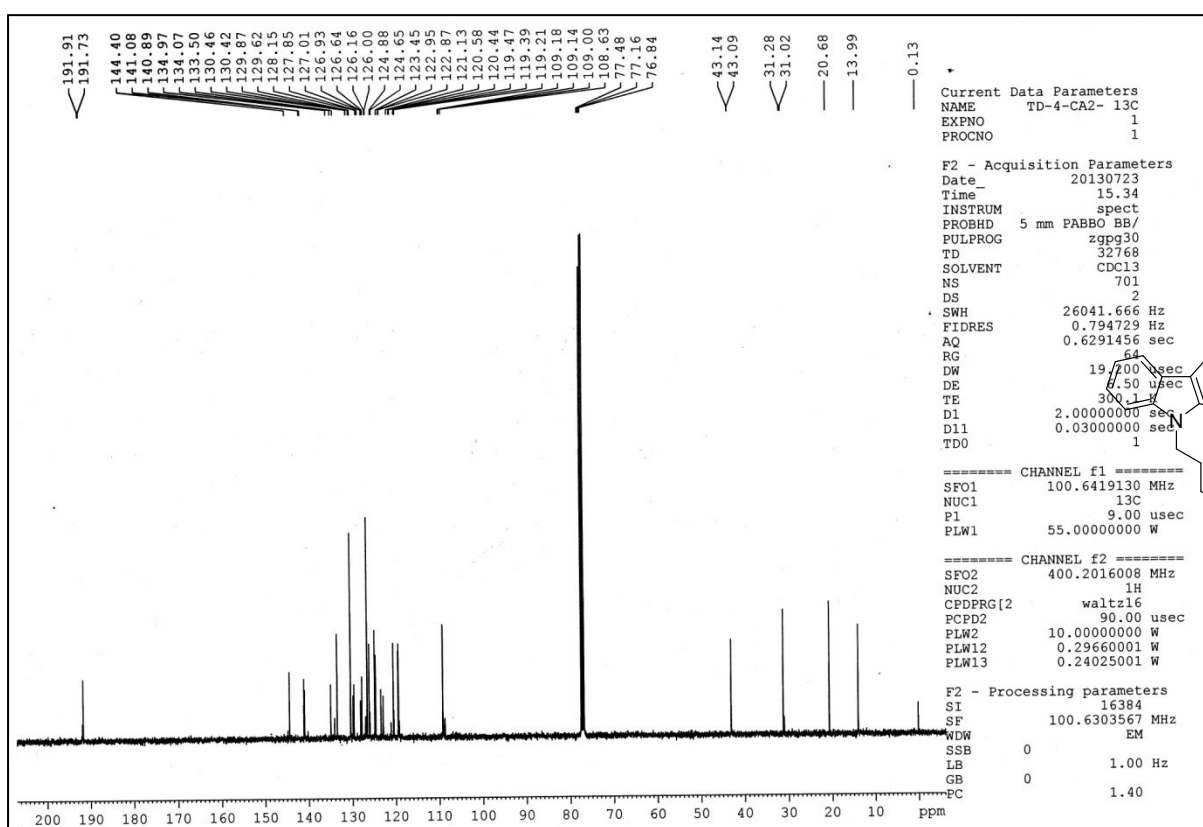

Figure S17: <sup>13</sup>C NMR (100 MHz) spectrum of compound 4 in CDCl<sub>3</sub>

# MS-Analyse

Universität Duisburg-Essen  
Institut für Organische Chemie

## Analysis Info

Analysis Name Y:\MS-Data\AK-Schrader\Schrader\140227-SPG-KA-CA2-esi-pos\_2396.d  
MS-Method 130717-ESI-pos-50-4000-2GHz.m Acquisition Date 27.02.2014 16:32:30  
LC-Method Instrument maXis 4G 20226  
AS-Method Operator Karow

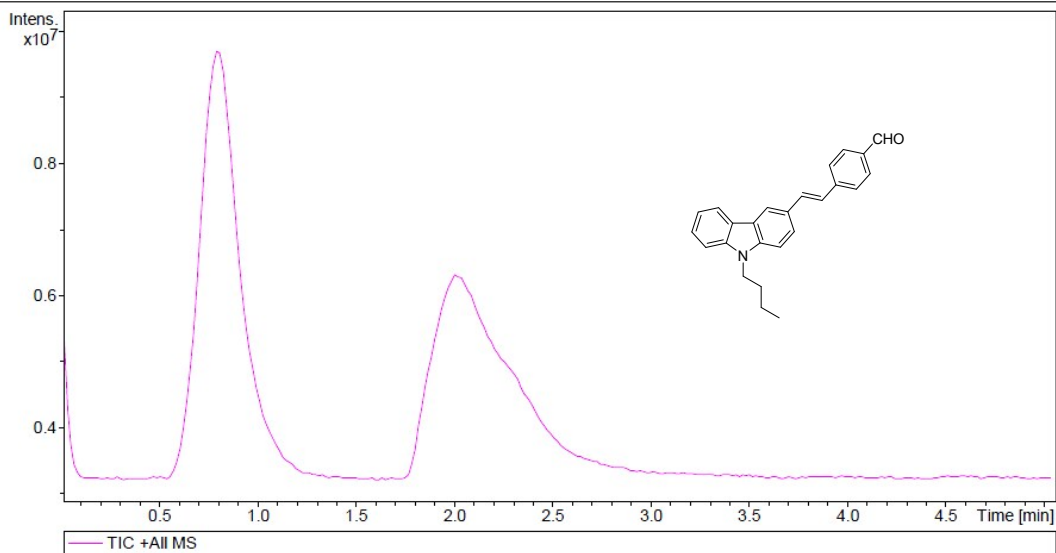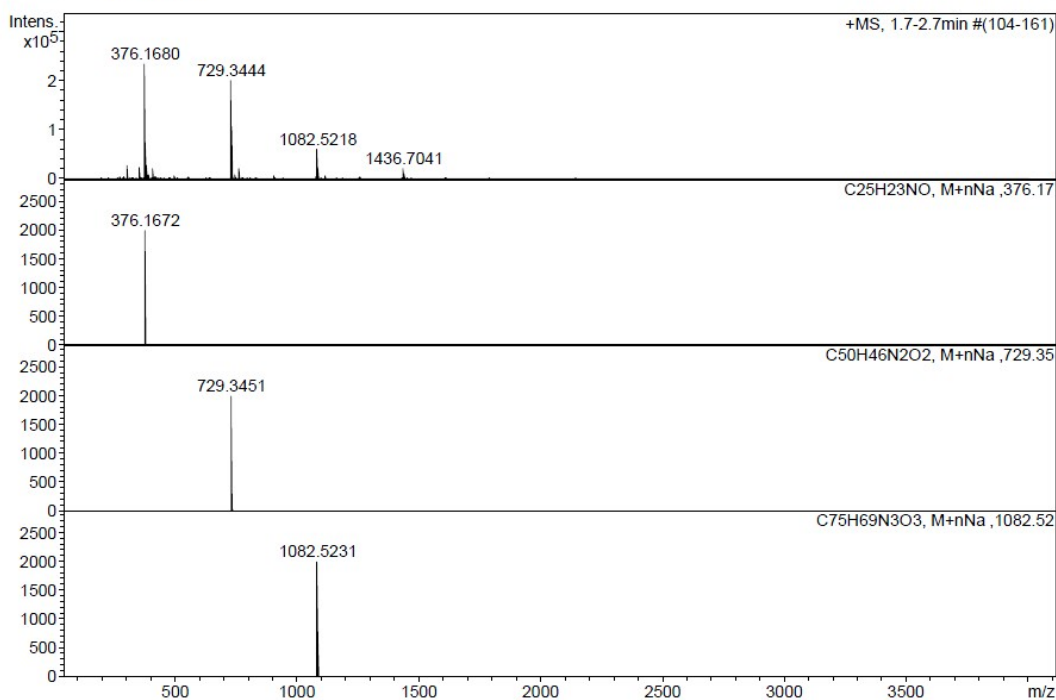

**Figure S18:** HRMS spectrum of compound 4

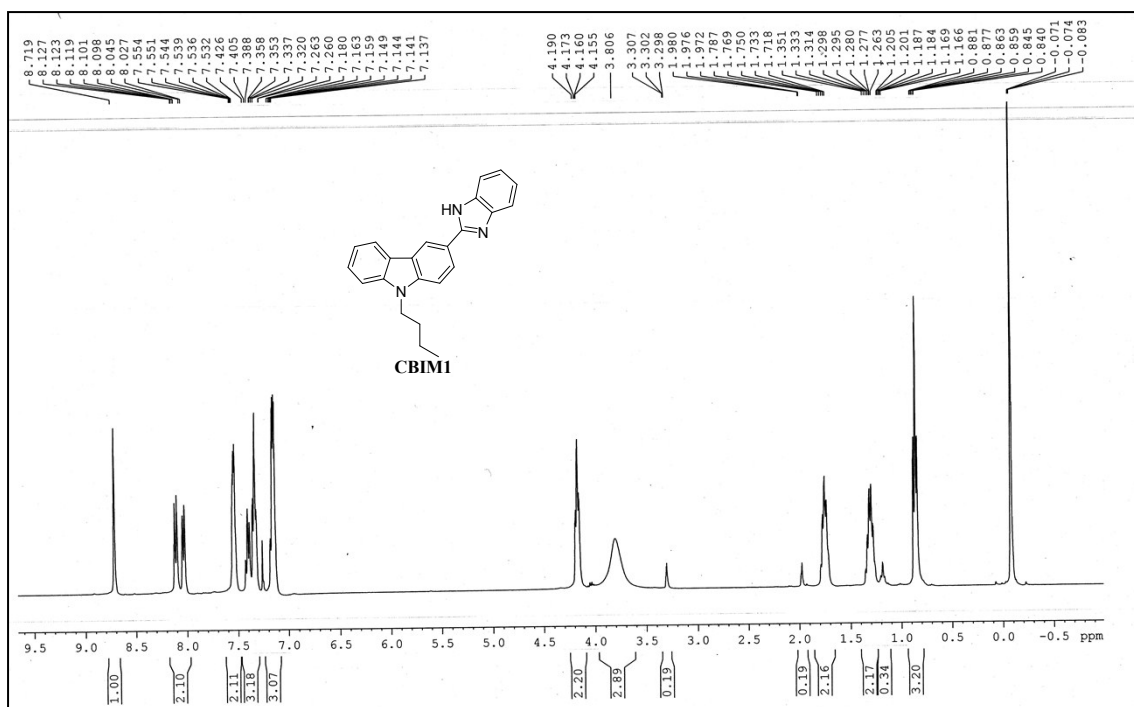

Figure S19: <sup>1</sup>H NMR (400 MHz) spectra of CBIM1 in CDCl<sub>3</sub>

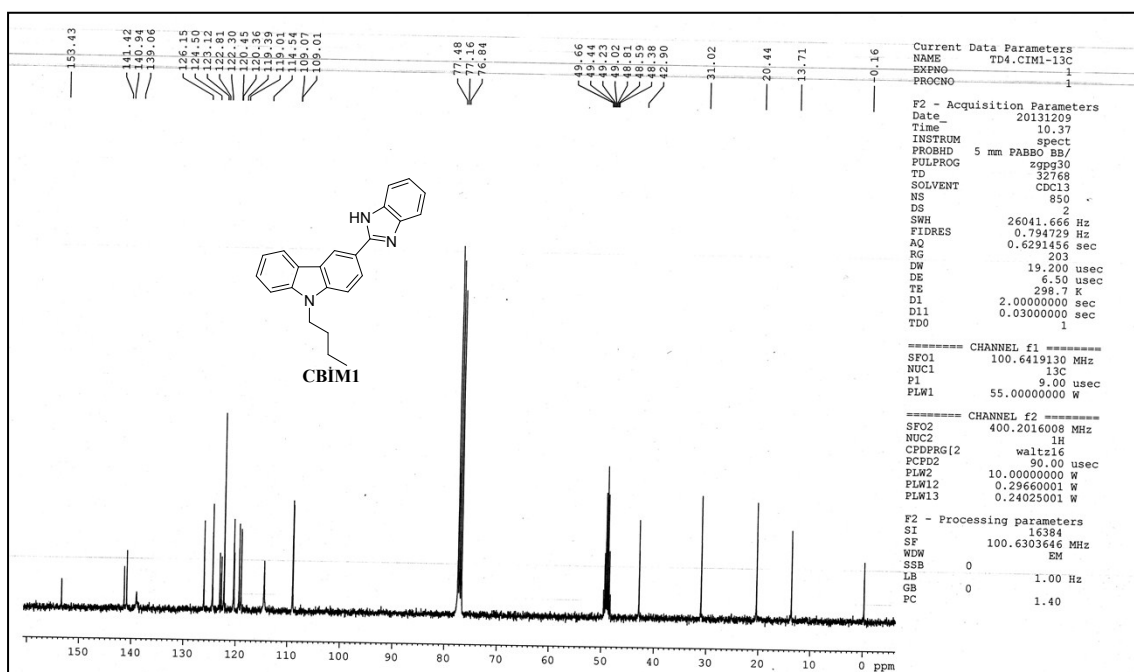

Figure S20: <sup>13</sup>C NMR (100 MHz) spectrum of CBIM1 in CDCl<sub>3</sub>

# MS-Analyse

Universität Duisburg-Essen  
Institut für Organische Chemie

## Analysis Info

Analysis Name Y:\MS-Data\AK-Schrader\Schrader\140227-SPG-KA-C-M1-esi-pos\_2393.d  
MS-Method 130717-ESI-pos-50-4000-2GHz.m Acquisition Date 27.02.2014 16:13:57  
LC-Method Instrument maXis 4G 20226  
AS-Method Operator Karow

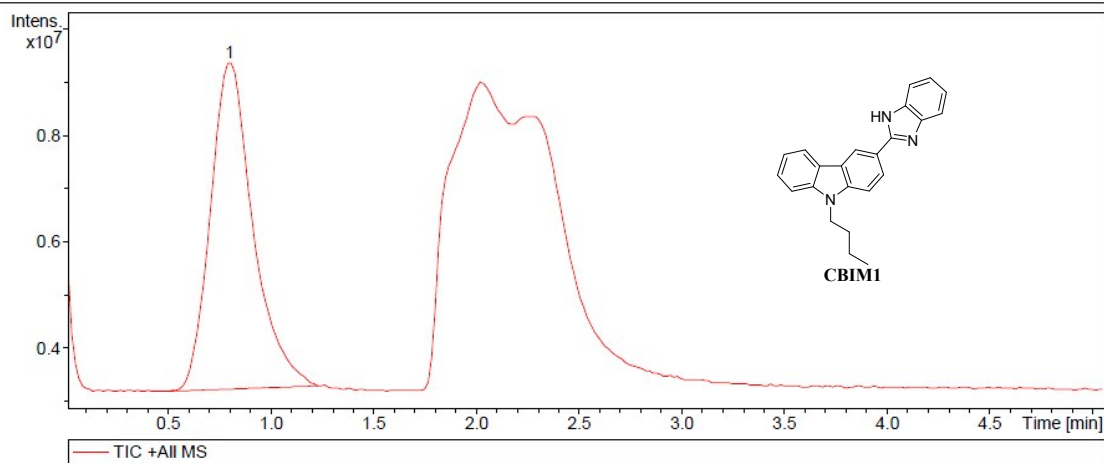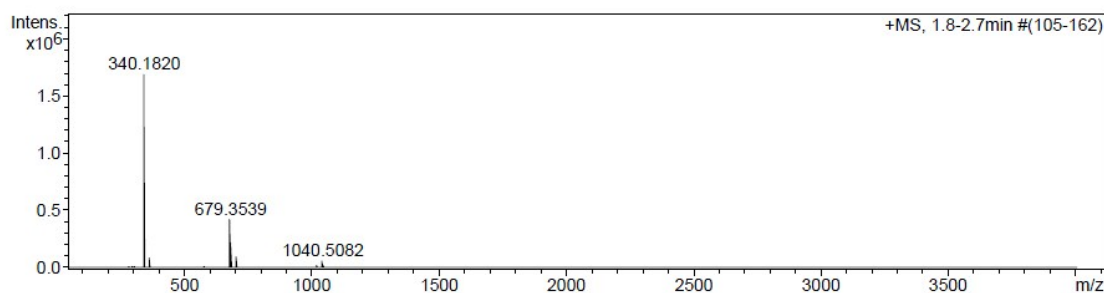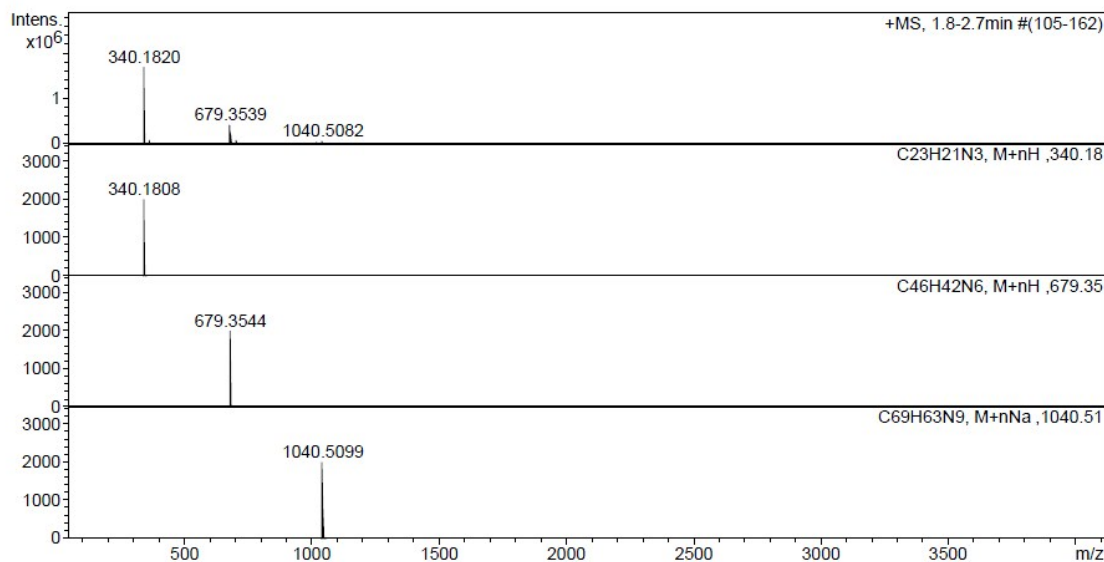

Figure S21: HRMS spectrum of CBIM1



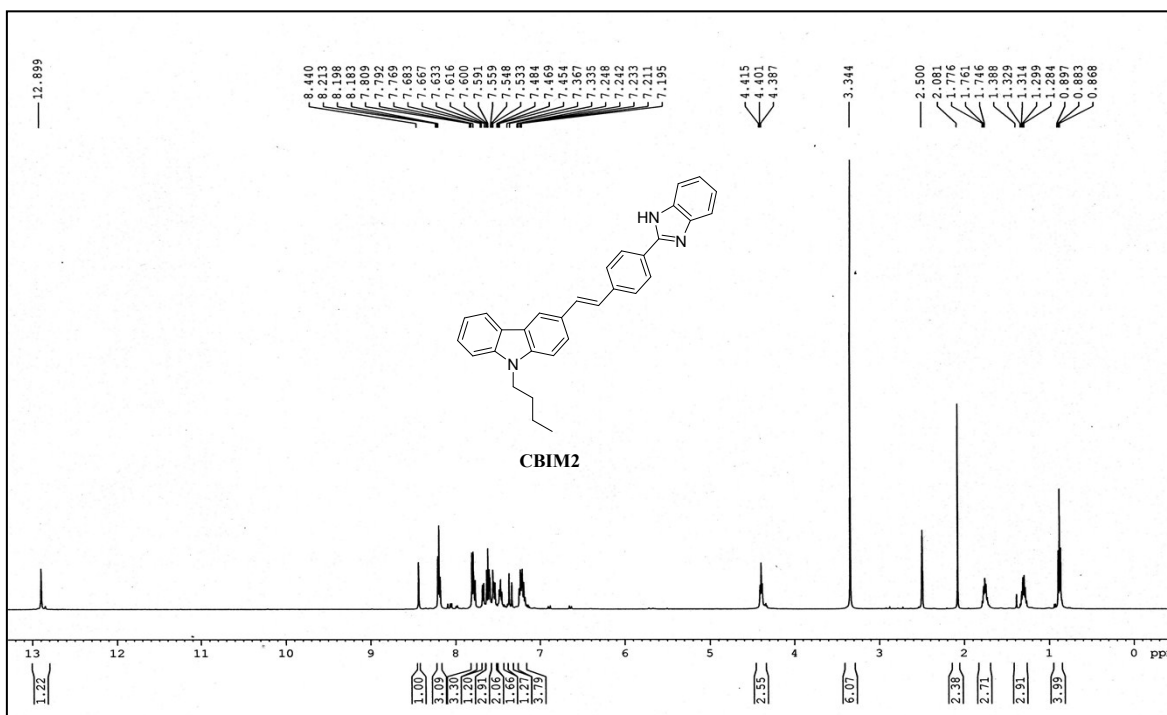

**Figure S22:** <sup>1</sup>H NMR (400 MHz) spectrum of CBIM2 in d<sub>6</sub>-DMSO

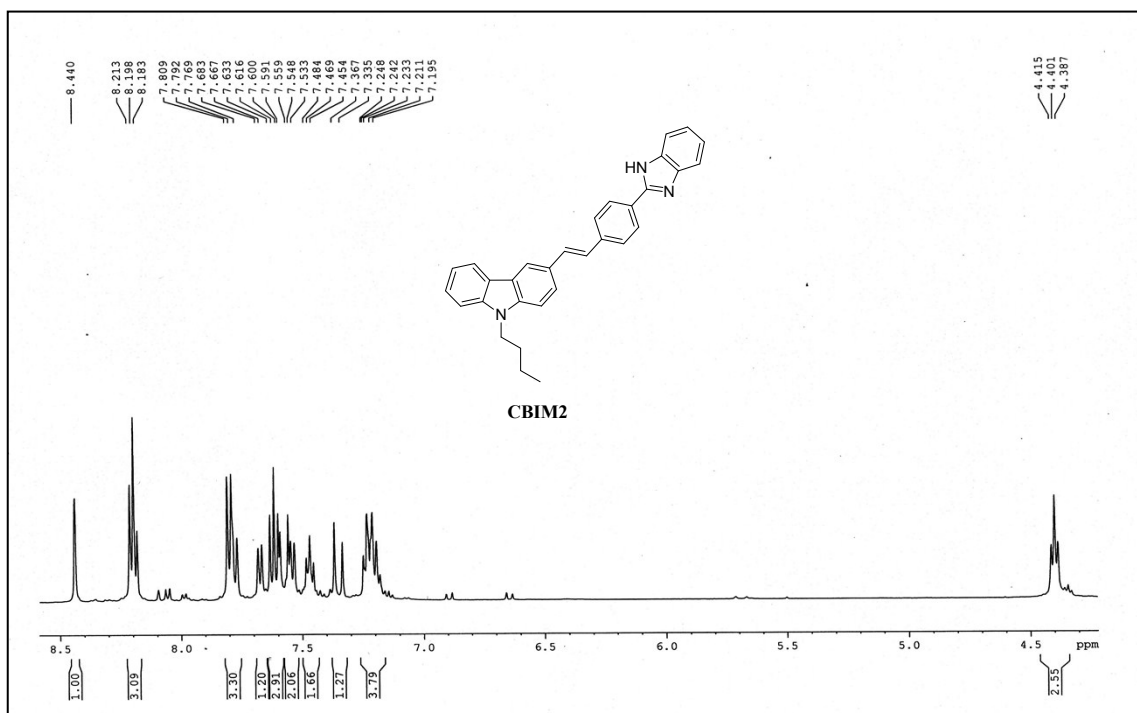

**Figure S22a:** Expansion mode of <sup>1</sup>H NMR (400 MHz) spectrum of CBIM2 in d<sub>6</sub>-DMSO

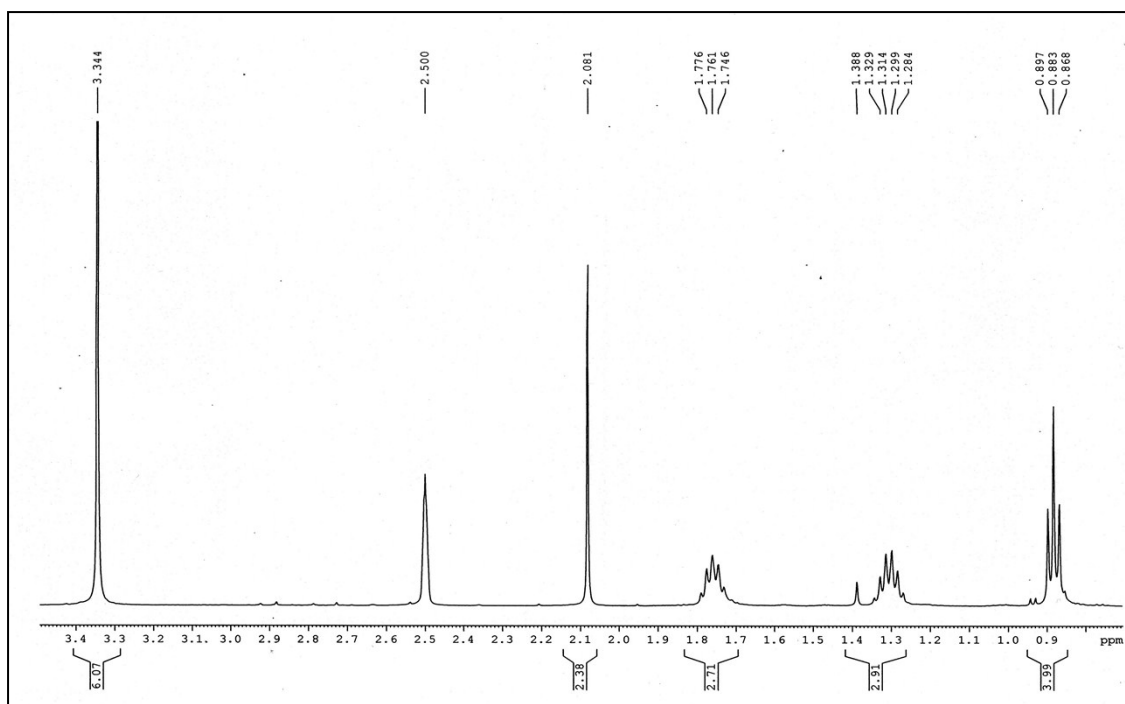

Figure S22b: Expansion mode of  $^1\text{H}$  NMR (400 MHz) spectrum of CBIM2 in  $d_6$ -DMSO

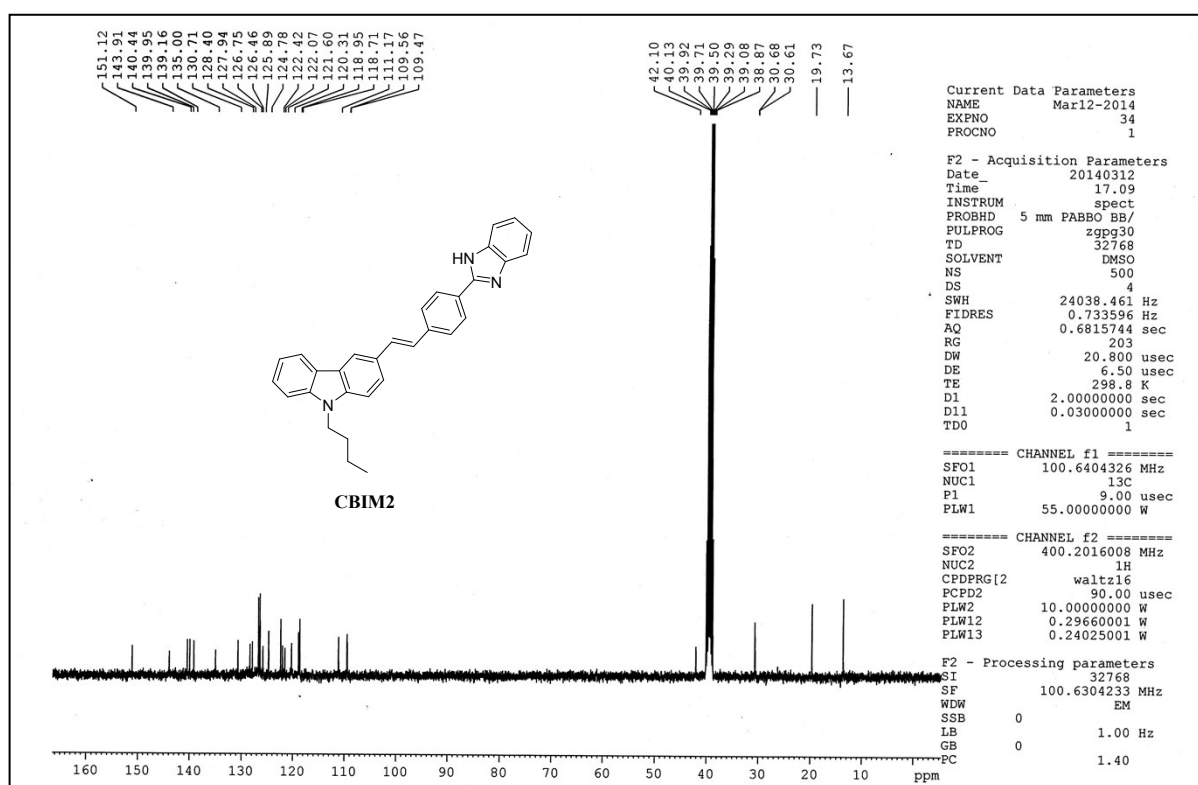

Figure S23:  $^{13}\text{C}$  spectrum of CBIM2 in  $d_6$ -DMSO

# MS-Analyse

Universität Duisburg-Essen  
Institut für Organische Chemie

## Analysis Info

Analysis Name Y:\MS-Data\AK-Schrader\Schrader\140227-SPG-KA-C-M2-esi-pos\_2394.d  
MS-Method 130717-ESI-pos-50-4000-2GHz.m Acquisition Date 27.02.2014 16:20:08  
LC-Method Instrument maXis 4G 20226  
AS-Method Operator Karow

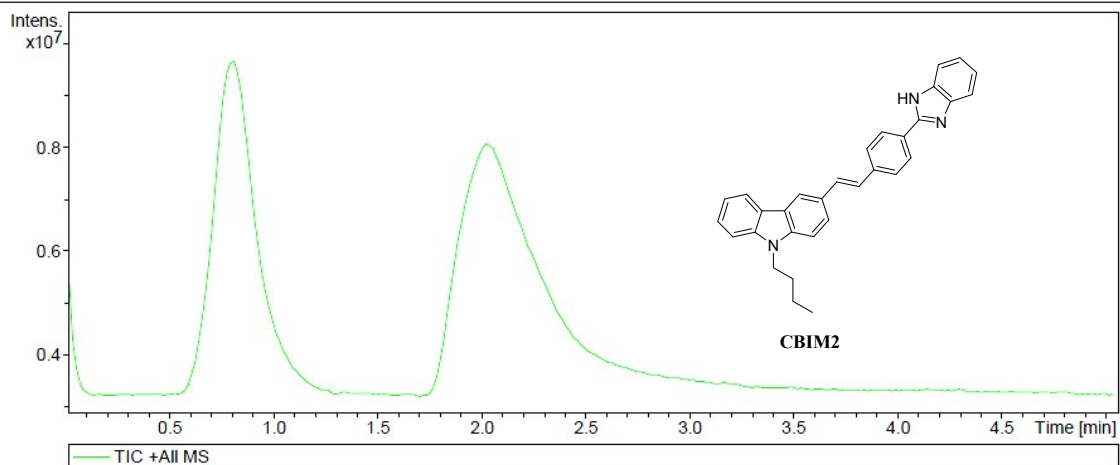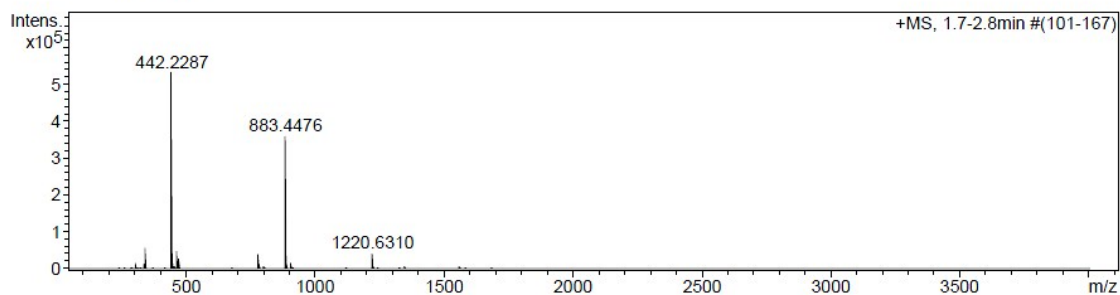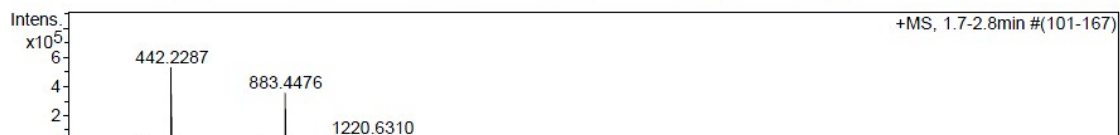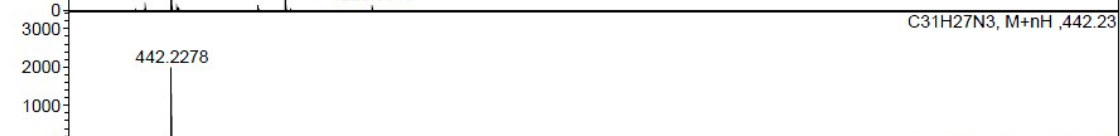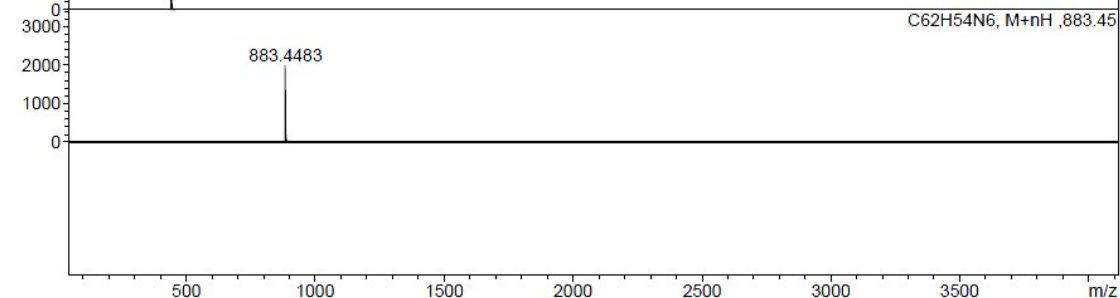

Figure S24: HRMS spectrum of CBIM2

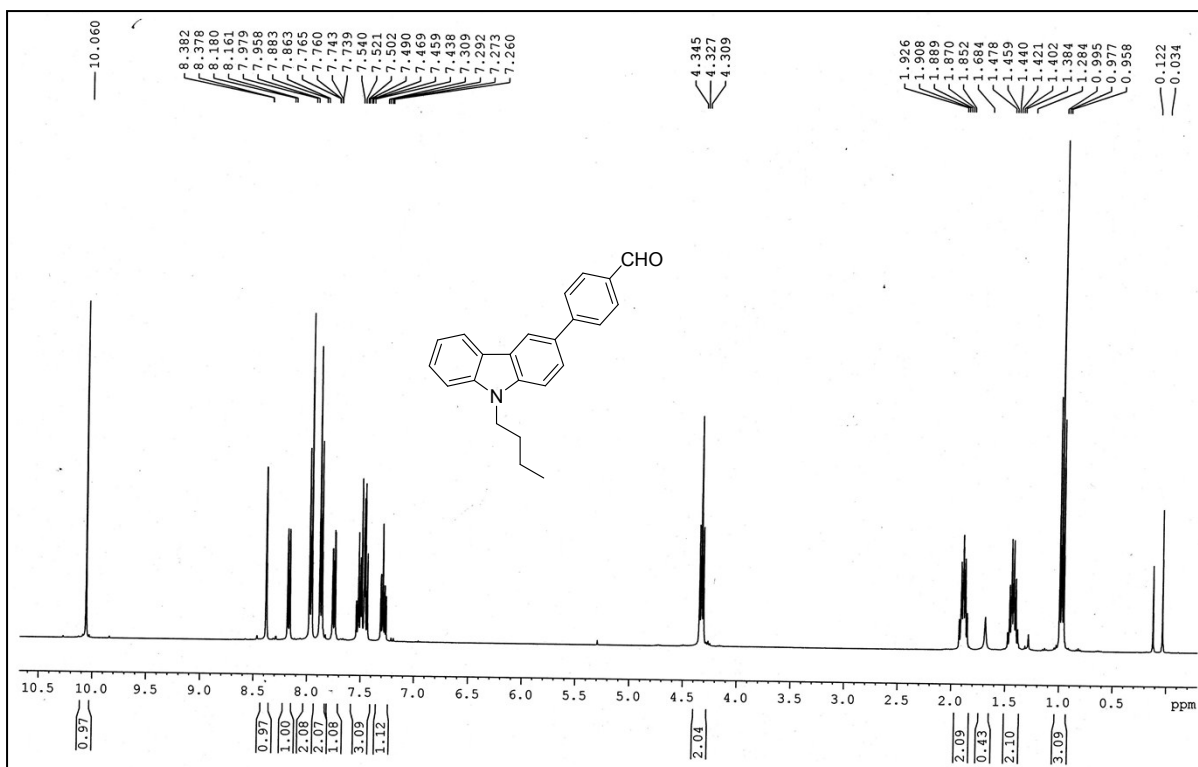

Figure S25: <sup>1</sup>H NMR (400 MHz) of compound 6 in CDCl<sub>3</sub>.

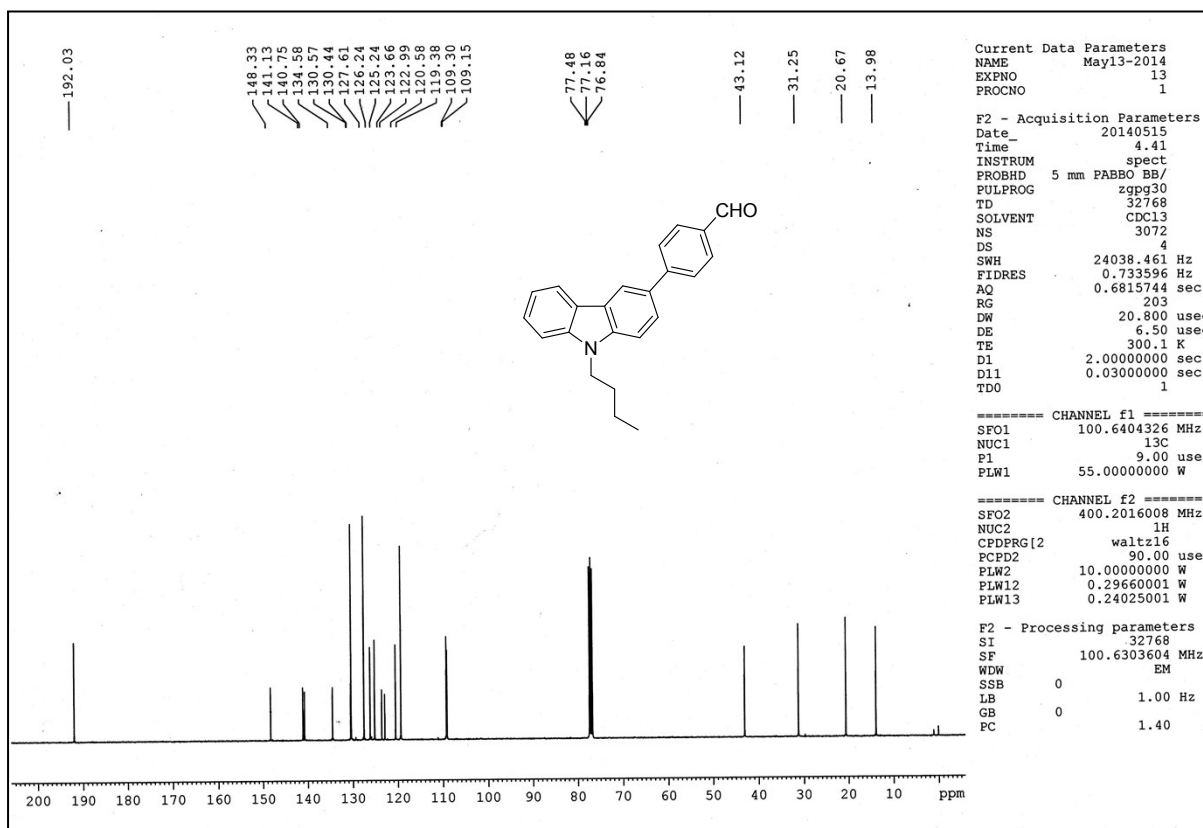

Figure S26: <sup>13</sup>C NMR (100 MHz) of compound 6 in CDCl<sub>3</sub>.

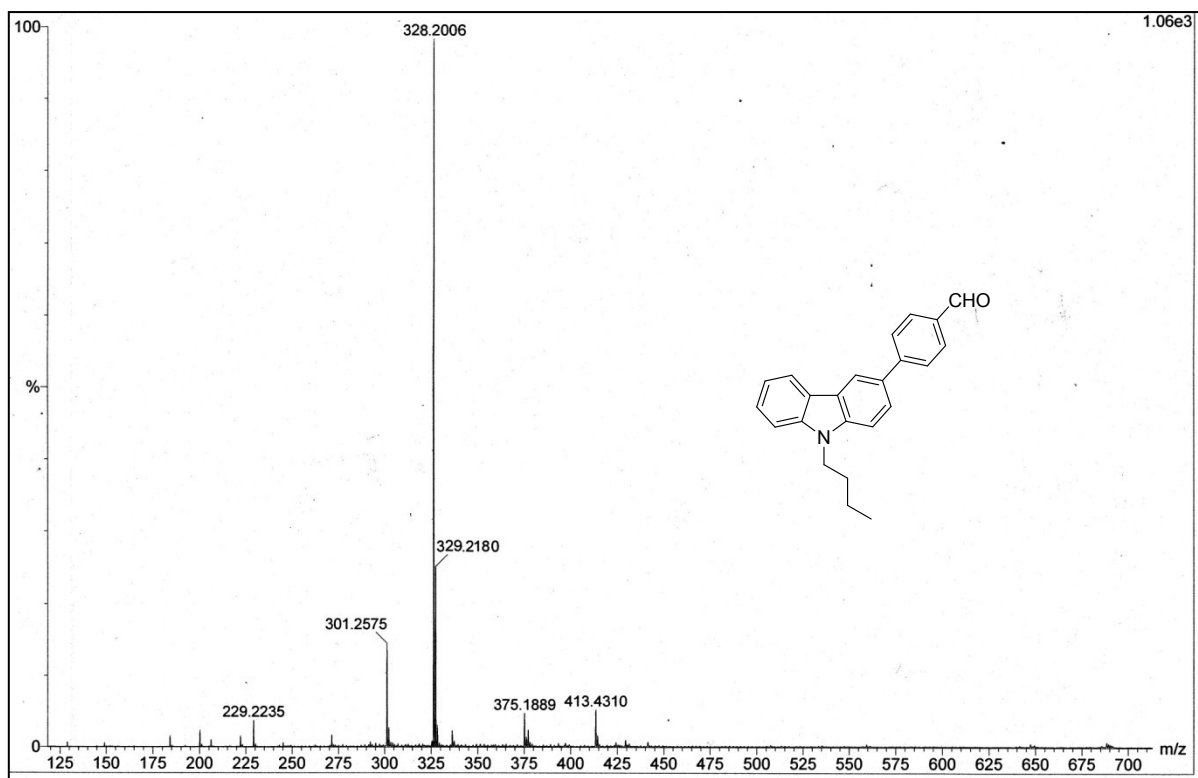

Figure S27: HRMS of compound 6

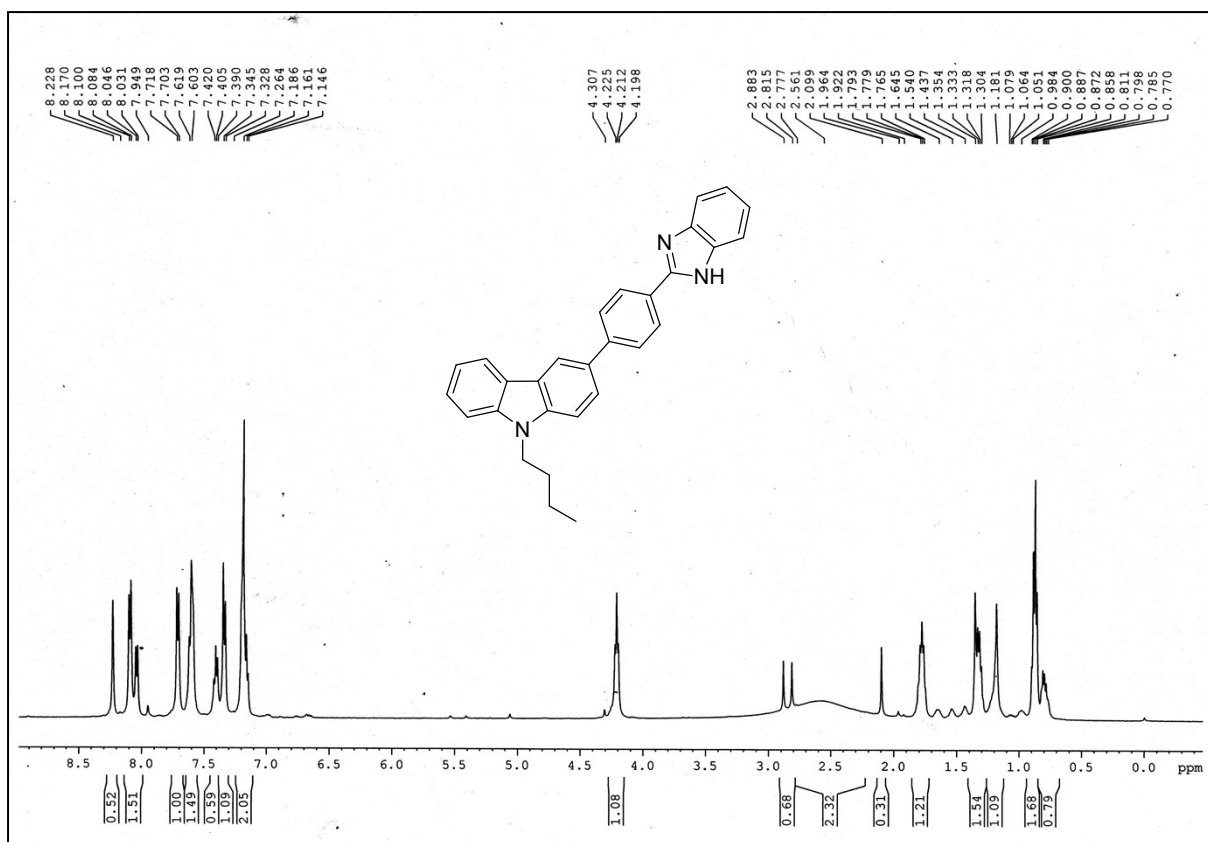

Figure S28:  $^1\text{H}$  NMR (500 MHz) of CBIM3 in  $\text{CDCl}_3$ .

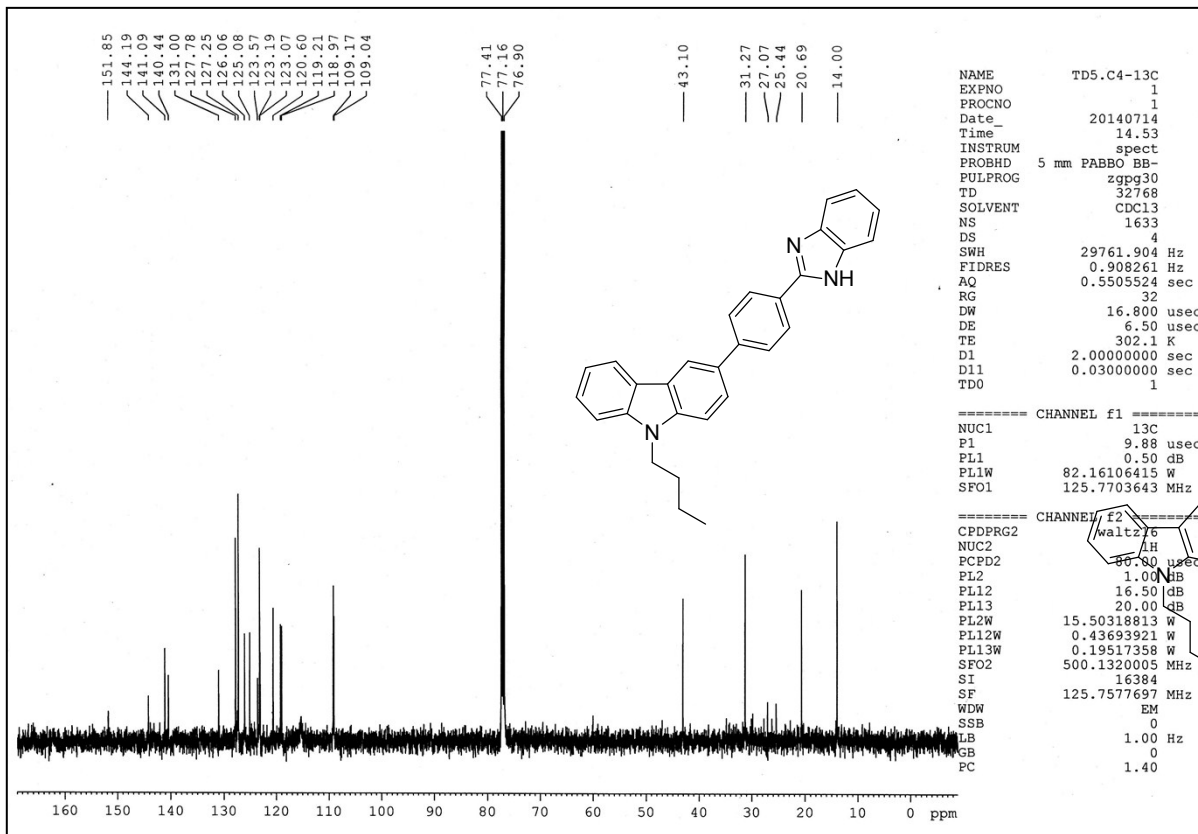

Figure S29: <sup>13</sup>C NMR (125 MHz) of CBIM3 in CDCl<sub>3</sub>

Figure S30: HRMS of CBIM3

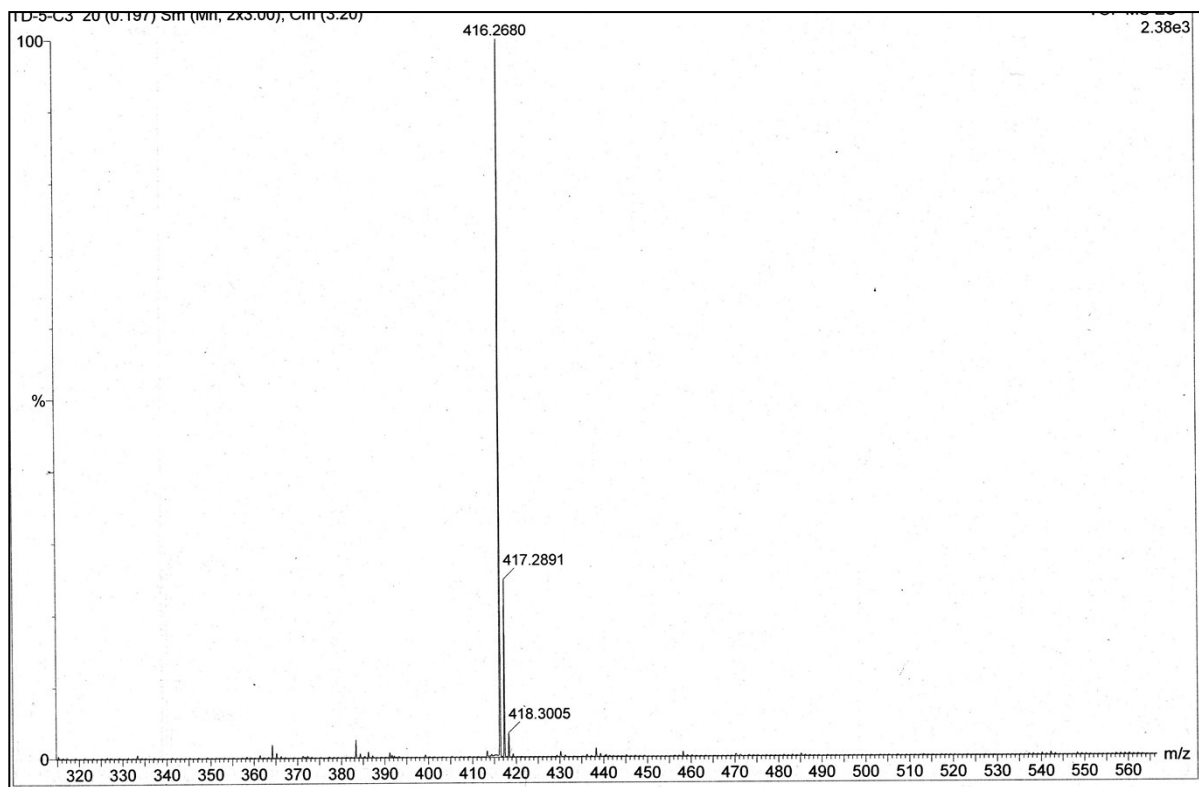

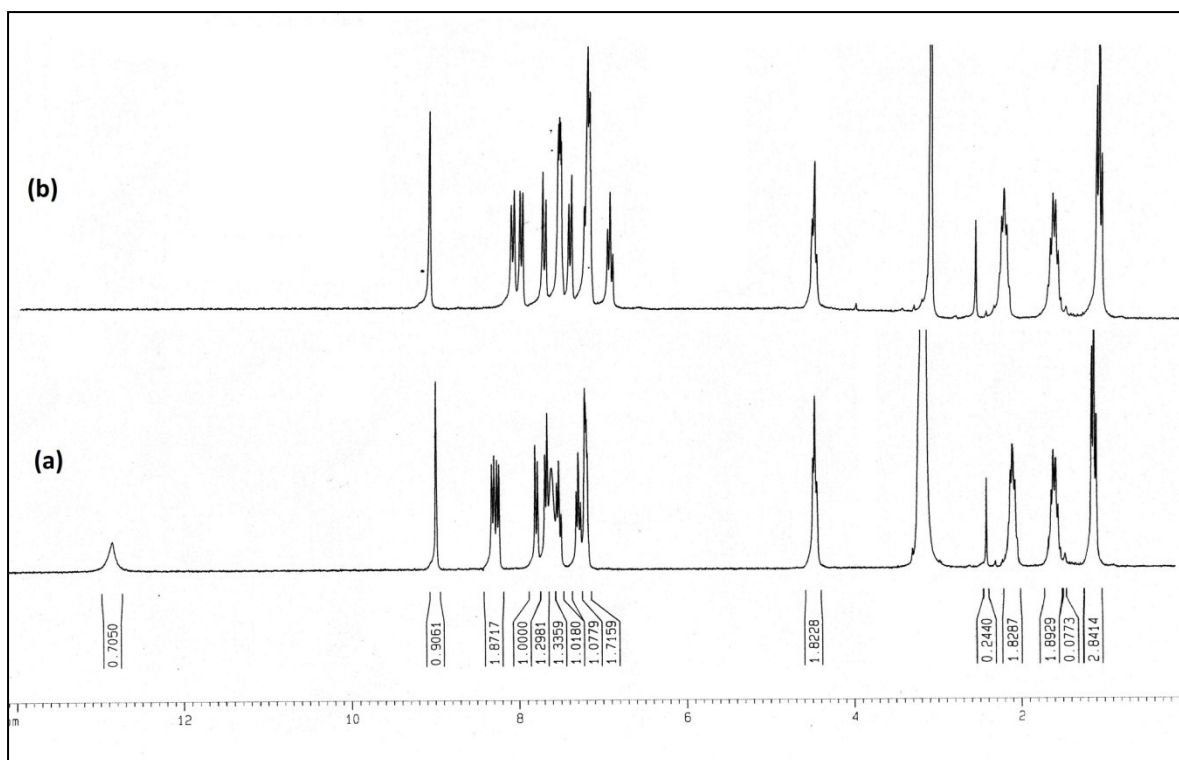

**Figure S31:** Partial  $^1\text{H}$  NMR (400 MHz) spectra of (a) CBIM1 ( $2.5 \times 10^{-3}$  M) and (b) [CBIM1+ TFA ( $2.4 \times 10^{-3}$  M)] in  $d_6$  DMSO.

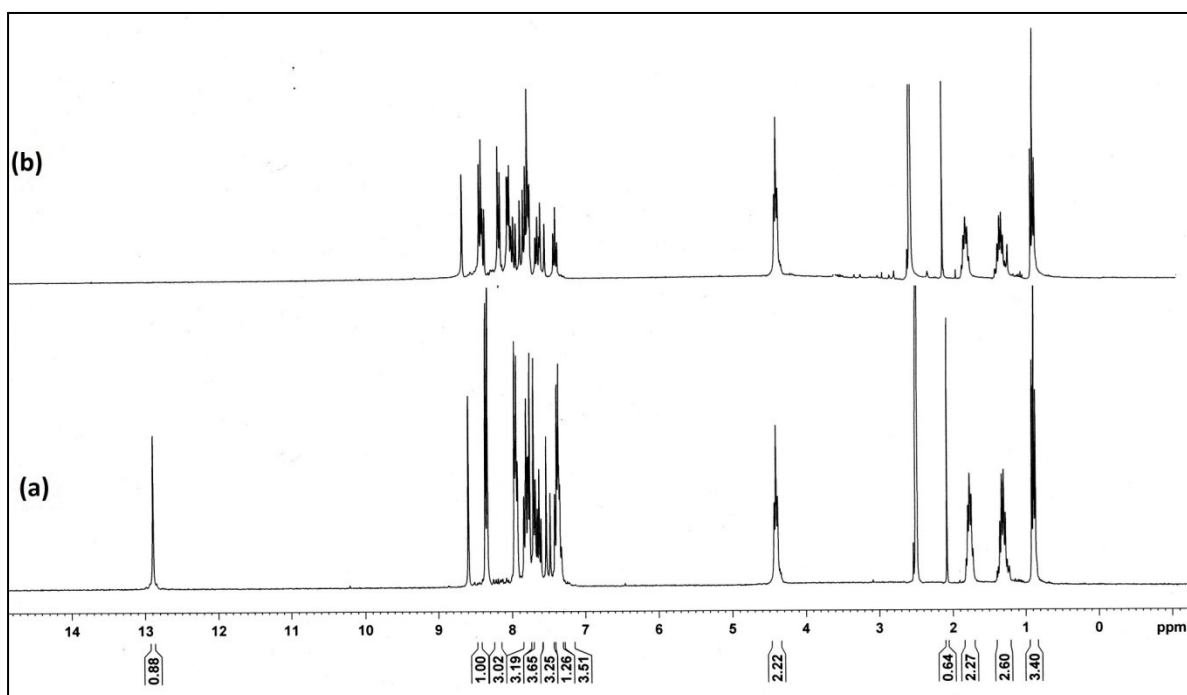

**Figure S32:** Partial  $^1\text{H}$  NMR (400 MHz) spectra of (a) CBIM2 ( $2.0 \times 10^{-3}$  M) and (b) [CBIM2 + TFA ( $2.2 \times 10^{-3}$  M)] in  $d_6$  DMSO.

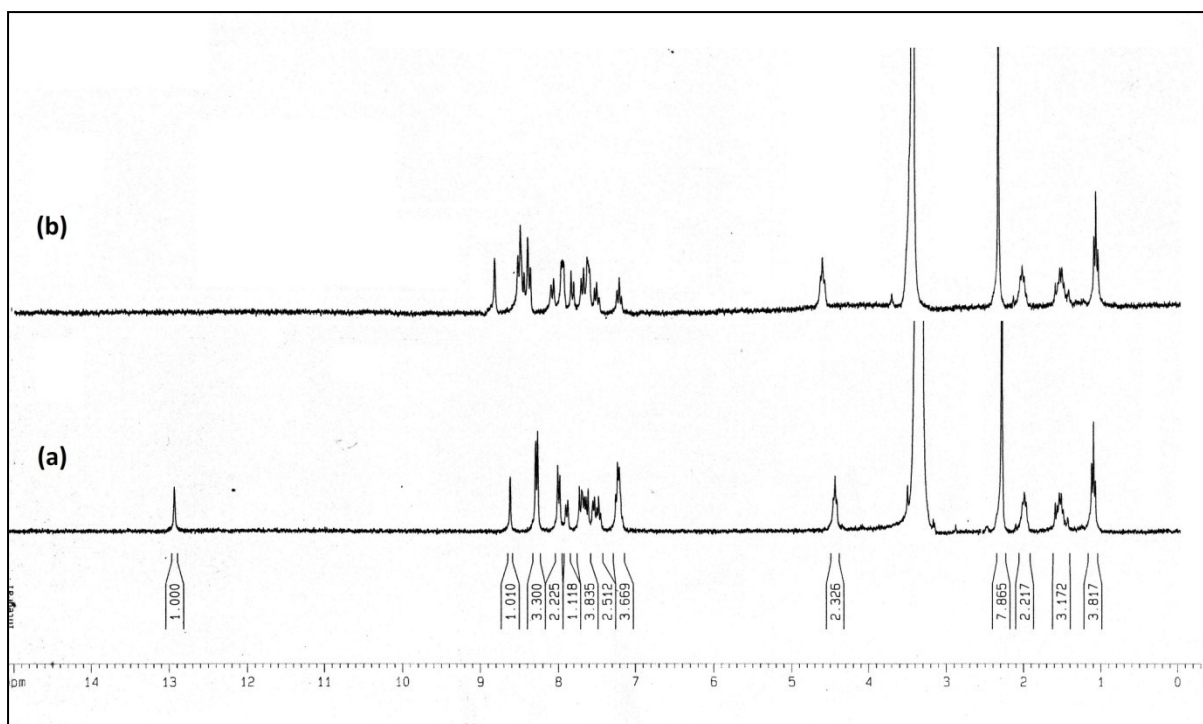

**Figure S33:** Partial  $^1\text{H}$  NMR (400 MHz) spectra of (a) CBIM3 ( $1.2 \times 10^{-3}$  M) and (b) [CBIM3 + TFA ( $1.4 \times 10^{-3}$  M)] in  $d_6$  DMSO.

**Table S6:** X-ray crystallographic data of compound 4.

|                |                                       |
|----------------|---------------------------------------|
| Compound       | Compound 4                            |
| Formula        | $\text{C}_{25}\text{H}_{23}\text{NO}$ |
| Formula Weight | 353.44                                |
| Crystal System | Triclinic                             |
| Space Group    | $P-1$                                 |
| T, K           | 115                                   |
| Z              | 4                                     |
| a, Å           | 9.5496 (7)                            |
| b, Å           | 113126 (8)                            |
| c, Å           | 18.0480 (13)                          |
| $\alpha$ , deg | 80.204 (5)                            |
| $\beta$ , deg  | 86.141 (5)                            |



|                                        |                                                                                  |
|----------------------------------------|----------------------------------------------------------------------------------|
| $\gamma$ , deg                         | 89.079 (13)                                                                      |
| $V$ , Å <sup>3</sup>                   | 1916.9 (2)                                                                       |
| $d_{\text{calcd}}$ , g/cm <sup>3</sup> | 1.225                                                                            |
| $\mu$ , mm <sup>-1</sup>               | 0.07                                                                             |
| Reflections with $I > 2\sigma(I)$      | 2873                                                                             |
| Independent reflections                | 6765                                                                             |
| $\theta$ range, deg                    | 1.8–25.0                                                                         |
| $hkl$ range                            | $h = -11 \rightarrow 11$<br>$k = -13 \rightarrow 13$<br>$l = -21 \rightarrow 19$ |
| GOF ( $F^2$ )                          | 1.05                                                                             |
| $R_1$ ( $wR_2$ ), %                    | 0.098, 0.327                                                                     |
| Completeness, %                        | 99.9                                                                             |
| $T_{\text{min}}$ , $T_{\text{max}}$    | 0.945, 0.993                                                                     |

**Table S7:** Hydrogen-bond geometry (Å, °) of compound 4

| <b><i>D</i>—H...<i>A</i></b>         | <b><i>D</i>—H</b> | <b>H...<i>A</i></b> | <b><i>D</i>...<i>A</i></b> | <b><i>D</i>—H...<i>A</i></b> |
|--------------------------------------|-------------------|---------------------|----------------------------|------------------------------|
| <b>C24A—H24A...O1B<sup>i</sup></b>   | 0.99              | 2.60                | 3.330 (8)                  | 131                          |
| <b>C22A—H22B...Cg1<sup>ii</sup></b>  | 0.99              | 2.79                | 3.721 (6)                  | 156                          |
| <b>C22B—H22D...Cg2<sup>iii</sup></b> | 0.99              | 2.90                | 3.760 (6)                  | 145                          |

Symmetry code: (i)  $-x+2, -y+1, -z$  (ii)  $-1+x, y, z$  (iii)  $x, y, z$ .

\* Cg1 and Cg2 are the centroids of the C1B—C3B/C10B—C12B and C1A—C3A/C10A—C12A rings.

**Table S8:** X-ray crystallographic details of compound 6

|                  |                                    |
|------------------|------------------------------------|
| Crystal data     |                                    |
| Chemical formula | C <sub>23</sub> H <sub>21</sub> NO |
| $M_r$            | 327.41                             |

|                                                                            |                                                                  |
|----------------------------------------------------------------------------|------------------------------------------------------------------|
| Crystal system, space group                                                | Monoclinic, $P2_1/c$                                             |
| Temperature (K)                                                            | 294                                                              |
| $a, b, c$ (Å)                                                              | 9.7031 (13), 11.7775 (14), 31.570 (4)                            |
| $\beta$ (°)                                                                | 95.921 (2)                                                       |
| $V$ (Å <sup>3</sup> )                                                      | 3588.6 (8)                                                       |
| $Z$                                                                        | 8                                                                |
| Radiation type                                                             | Mo $K\alpha$                                                     |
| $\mu$ (mm <sup>-1</sup> )                                                  | 0.07                                                             |
| Crystal size (mm)                                                          | 0.77 × 0.56 × 0.27                                               |
| Data collection                                                            |                                                                  |
| Diffractometer                                                             | Bruker <i>SMART APEX II</i> DUO CCD area-detector diffractometer |
| Absorption correction                                                      | Multi-scan ( <i>SADABS</i> ; Bruker, 2009)                       |
| $T_{\min}, T_{\max}$                                                       | 0.946, 0.980                                                     |
| No. of measured, independent and observed [ $I > 2\sigma(I)$ ] reflections | 26365, 7043, 4208                                                |
| $R_{\text{int}}$                                                           | 0.034                                                            |
| $(\sin \theta/\lambda)_{\text{max}}$ (Å <sup>-1</sup> )                    | 0.618                                                            |
| Refinement                                                                 |                                                                  |
| $R[F^2 > 2\sigma(F^2)], wR(F^2), S$                                        | 0.061, 0.202, 1.04                                               |
| No. of reflections                                                         | 7043                                                             |
| No. of parameters                                                          | 481                                                              |
| No. of restraints                                                          | 2                                                                |
| H-atom treatment                                                           | H-atom parameters constrained                                    |
| $\Delta\rho_{\text{max}}, \Delta\rho_{\text{min}}$ (e Å <sup>-3</sup> )    | 0.39, -0.17                                                      |
